# Supplementary material for: A “gold standard” computational proof for the existence of gold(iii) aurophilicity
Source: Royal Society of Chemistry journal article supplement (doi:10.1039/d2dt03731a), 2023-01-01
Supplement: d2dt03731a1.pdf [file d2dt03731a1.pdf]

## A “gold standard” computational proof for the existence of gold(III) aurophilicity

Daniel Blasco,<sup>\*†ab</sup> Félix Reboiro,<sup>†a</sup> Dage Sundholm,<sup>b</sup> M. Elena Olmos,<sup>a</sup> Miguel Monge,<sup>\*a</sup> and José M. López-de-Luzuriaga<sup>\*a</sup>

- a.* Departamento de Química, Centro de Investigación en Síntesis Química (CISQ), Universidad de La Rioja, Madre de Dios 53, 26006, Logroño, Spain.  
E-mail: miguel.monge@unirioja.es, josemaria.lopez@unirioja.es
- b.* Department of Chemistry, Faculty of Science, University of Helsinki, P.O. Box 55 (A.I. Virtasen aukio 1), FIN-00014, Helsinki, Finland.  
E-mail: daniel.blasco@helsinki.fi

† These authors contributed equally

### Electronic Supplementary Information (ESI)

Table of contents:

|                                                                                                                                                                 |    |
|-----------------------------------------------------------------------------------------------------------------------------------------------------------------|----|
| 1. Computational details.....                                                                                                                                   | 2  |
| 2. Interaction energy calculations on molecules <b>1-3</b> .....                                                                                                | 4  |
| 3. Energy decomposition analysis (EDA) of molecule <b>1</b> .....                                                                                               | 9  |
| 4. Interaction region indicator (IRI) analysis of molecule <b>2</b> .....                                                                                       | 10 |
| 5. Cartesian coordinates of molecule <b>1</b> .....                                                                                                             | 11 |
| 6. Cartesian coordinates of molecule <b>2</b> .....                                                                                                             | 21 |
| 7. Cartesian coordinates of molecule <b>3</b> .....                                                                                                             | 31 |
| 8. Cartesian coordinates of [Au <sup>III</sup> (CH <sub>3</sub> ) <sub>3</sub> (NH <sub>3</sub> )]···[(CH <sub>4</sub> ) <sub>3</sub> (NH <sub>3</sub> )] ..... | 41 |
| 9. Cartesian coordinates of [(CH <sub>4</sub> ) <sub>3</sub> (NH <sub>3</sub> )] <sub>2</sub> .....                                                             | 43 |

## 1. Computational details.

The calculations were carried out using TURBOMOLE version 7.5.1.<sup>1</sup> The optimized structures were visualized and rendered using UCSF ChimeraX.<sup>2</sup> The QTAIM descriptors and IRI isosurfaces were computed with Multiwfn,<sup>3</sup> and visualized and rendered with VMD.<sup>4</sup>

The structure of  $[\text{Au}^{\text{III}}(\text{CH}_3)_3(\text{NH}_3)]_2$  (molecule **1**) was built from scratch and optimized at the RI-MP2 level of theory<sup>5-7</sup> with def2-TZVP basis sets<sup>7-9</sup> for all atoms and a 60-electron effective core potential for gold (def2-ECP).<sup>10</sup> The structure of  $[\text{Au}^{\text{III}}(\text{N}_3)_4]_2^{2-}$  (molecule **2**) was extracted from the X-ray structure of  $[\text{NMe}_4][\text{Au}^{\text{III}}(\text{N}_3)_4]$ <sup>11</sup> and optimized using the same procedure. The structure of  $\{cis-[\text{Au}^{\text{III}}(\text{CH}_3)_2(\text{NH}_3)_2]\}_2^{2+}$  (molecule **3**) was built from the optimized structure of molecule **1** keeping the  $\text{Au}^{\text{III}}\cdots\text{Au}^{\text{III}}$  distance frozen and optimized using the same procedure. The three structures were constrained to the  $C_2$  point group for reducing the computational efforts. The internal coordinate corresponding to the gold(III) $\cdots$ gold(III) distance was manually stretched to the selected values while all other internal coordinates were kept intact. The interaction energies between  $[\text{Au}^{\text{III}}(\text{CH}_3)_3(\text{NH}_3)]_2$ ,  $[\text{Au}^{\text{III}}(\text{N}_3)_4]_2^{2-}$  and  $\{cis-[\text{Au}^{\text{III}}(\text{CH}_3)_2(\text{NH}_3)_2]\}_2^{2+}$  monomers, respectively, were calculated at the RHF,<sup>12</sup> RI-MP2,<sup>5-7</sup> and CCSD(T)<sup>13</sup> levels of theory using Eq. S1 for the counterpoise correction of the basis set superposition error,<sup>14,15</sup>

$$\Delta E_{\text{int}} = E_{\text{AB}}^{(\text{AB})} - E_{\text{A}}^{(\text{AB})} - E_{\text{B}}^{(\text{AB})} \quad (\text{S1})$$

where  $\Delta E_{\text{int}}$  is the interaction energy, and  $E_{\text{AB}}^{(\text{AB})}$ ,  $E_{\text{A}}^{(\text{AB})}$ ,  $E_{\text{B}}^{(\text{AB})}$  are the energies of the dimer and monomers, respectively, calculated using the basis sets of the dimer. The calculation points were fitted using Eq. S2, which has been previously used to derive the Herschbach-Laurie relation,<sup>16</sup>

$$\Delta E_{\text{int}}(R) = A \cdot \exp(-B \cdot R) - C \cdot R^D \quad (\text{S2})$$

where  $R$  is the gold(III) $\cdots$ gold(III) distance and  $A$ ,  $B$ ,  $C$ ,  $D$  are fitting parameters.

The contribution from the  $\text{Au}^{\text{III}}\cdots[\text{ligand}]$  and interligand interactions to the total interaction energy of molecule **1** has been partially removed by subtracting twice that calculated for a monomer of **1** and the saturated ligands of the other monomer at the RI-MP2 and CCSD(T)  $\text{Au}^{\text{III}}\cdots\text{Au}^{\text{III}}$  equilibrium distances, respectively. The extra  $[\text{ligand}]\cdots[\text{ligand}]$  interaction energy that has been removed this way has been restored by adding that of the saturated ligands of  $[(\text{CH}_3)_3(\text{NH}_3)]_2$ . Then, the gold(III) atoms were manually removed from molecule **1** at the RI-MP2 and CCSD(T)  $\text{Au}^{\text{III}}\cdots\text{Au}^{\text{III}}$  equilibrium distances and replaced with hydrogen atoms attached to the carbon atoms. The position of the added hydrogen atoms was refined by optimizing the structure at the RI-MP2/def2-TZVP level of theory while keeping all other positions of the atoms fixed. Interaction energy calculations were then carried out.

## References.

- 1 S. G. Balasubramani, G. P. Chen, S. Coriani, M. Diedenhofen, M. S. Frank, Y. J. Franzke, F. Furche, R. Grotjahn, M. E. Harding, C. Hättig, A. Hellweg, B. Helmich-Paris, C. Holzer, U. Huniar, M. Kaupp, A. Marefat Khah, S. Karbalaei Khani, T. Müller, F. Mack, B. D. Nguyen, S. M. Parker, E. Perlt, D. Rappoport, K. Reiter, S. Roy, M. Rückert, G. Schmitz, M. Sierka, E. Tapavicza, D. P. Tew, C. van Wüllen, V. K. Voora, F. Weigend, A. Wodyński and J. M. Yu, *J. Chem. Phys.*, 2020, **152**, 184107.
- 2 E. F. Pettersen, T. D. Goddard, C. C. Huang, E. C. Meng, G. S. Couch, T. I. Croll, J. H. Morris and T. E. Ferrin, *Protein Sci.*, 2021, **30**, 70–82.
- 3 T. Lu and F. Chen, *J. Comput. Chem.*, 2012, **33**, 580–592.
- 4 W. Humphrey, A. Dalke and K. Schulten, *J. Mol. Graph.*, 1996, **14**, 27-28,33-38.
- 5 F. Weigend and M. Häser, *Theor. Chem. Acc.*, 1997, **97**, 331–340.
- 6 C. Hättig, A. Hellweg and A. Köhn, *Phys. Chem. Chem. Phys.*, 2006, **8**, 1159–1169.
- 7 F. Weigend, M. Häser, H. Patzelt and R. Ahlrichs, *Chem. Phys. Lett.*, 1998, **294**, 143–152.
- 8 F. Weigend and R. Ahlrichs, *Phys. Chem. Chem. Phys.*, 2005, **7**, 3297–3305.
- 9 A. Hellweg, C. Hättig, S. Höfener and W. Klopper, *Theor. Chem. Acc.*, 2007, **117**, 587–597.
- 10 H. T. Andrae, D.; Häußermann, U.; Dolg, M.; Stoll, H.; Preuß, *Theor. Chim. Acta*, 1990, **77**, 123–141.
- 11 T. M. Klapötke, B. Krumm, J.-C. Galvez-Ruiz and H. Nöth, *Inorg. Chem.*, 2005, **44**, 9625–9627.
- 12 M. Häser and R. Ahlrichs, *J. Comput. Chem.*, 1989, **10**, 104–111.
- 13 K. Raghavachari, G. W. Trucks, J. A. Pople and M. Head-Gordon, *Chem. Phys. Lett.*, 1989, **157**, 479–483.
- 14 H. B. Jansen and P. Ros, *Chem. Phys. Lett.*, 1969, **3**, 140–143.
- 15 S. F. Boys and F. Bernardi, *Mol. Phys.*, 1970, **19**, 553–566.
- 16 D. R. Herschbach and V. W. Laurie, *J. Chem. Phys.*, 1961, **35**, 458–464.

## 2. Interaction energy calculations on molecules 1-3.

**Table S1.** Absolute energies of the dimer ( $E_{AB}^{(AB)}$  in Hartree) and monomers ( $E_A^{(AB)}$  in Hartree), calculated using the basis sets of the dimer, and interaction energies ( $\Delta E_{int}$  in Hartree and  $\text{kJ}\cdot\text{mol}^{-1}$ ) as a function of the  $\text{Au}^{\text{III}}\cdots\text{Au}^{\text{III}}$  distance ( $R$  in Å) for molecule **1** at the RHF, RI-MP2 and CCSD(T) levels of theory

| $R$  | RHF             |               |                  |                                 | RI-MP2          |               |                  |                                 | CCSD(T)         |               |                  |                                 |
|------|-----------------|---------------|------------------|---------------------------------|-----------------|---------------|------------------|---------------------------------|-----------------|---------------|------------------|---------------------------------|
|      | $E_{AB}^{(AB)}$ | $E_A^{(AB)a}$ | $\Delta E_{int}$ |                                 | $E_{AB}^{(AB)}$ | $E_A^{(AB)a}$ | $\Delta E_{int}$ |                                 | $E_{AB}^{(AB)}$ | $E_A^{(AB)a}$ | $\Delta E_{int}$ |                                 |
|      |                 |               | Ha               | $\text{kJ}\cdot\text{mol}^{-1}$ |                 |               | Ha               | $\text{kJ}\cdot\text{mol}^{-1}$ |                 |               | Ha               | $\text{kJ}\cdot\text{mol}^{-1}$ |
| 2.80 | -619.56997      | -309.81949    | 0.06902          | 181.20495                       | -622.15261      | -311.08378    | 0.01495          | 39.25646                        | -622.24321      | -311.13568    | 0.02815          | 73.91991                        |
| 3.00 | -619.60580      | -309.81943    | 0.03306          | 86.79141                        | -622.17289      | -311.08244    | -0.00800         | -21.00395                       | -622.26687      | -311.13427    | 0.00167          | 4.37502                         |
| 3.20 | -619.62551      | -309.81937    | 0.01323          | 34.73135                        | -622.18086      | -311.08139    | -0.01808         | -47.47626                       | -622.27723      | -311.13314    | -0.01095         | -28.73994                       |
| 3.40 | -619.63599      | -309.81933    | 0.00266          | 6.98846                         | -622.18239      | -311.08052    | -0.02135         | -56.06746                       | -622.28043      | -311.13220    | -0.01602         | -42.06491                       |
| 3.48 | -619,63856      | -309,81931    | 6,16027E-5       | 0,16174                         | -622,18201      | -311,08022    | -0,02158         | -56,64586                       | -               | -             | -                | -                               |
| 3.60 | -619.64125      | -309.81929    | -0.00267         | -6.99847                        | -622.18081      | -311.07980    | -0.02120         | -55.67190                       | -622.28000      | -311.13142    | -0.01716         | -45.05078                       |
| 3.80 | -619.64362      | -309.81926    | -0.00509         | -13.35716                       | -622.17793      | -311.07922    | -0.01949         | -51.18338                       | -622.27795      | -311.13078    | -0.01638         | -43.00517                       |
| 4.00 | -619.64442      | -309.81924    | -0.00594         | -15.59703                       | -622.17475      | -311.07877    | -0.01722         | -45.19857                       | -622.27537      | -311.13029    | -0.01478         | -38.80862                       |
| 4.20 | -619.64441      | -309.81921    | -0.00598         | -15.70392                       | -622.17170      | -311.07842    | -0.01487         | -39.02831                       | -622.27279      | -311.12992    | -0.01294         | -33.96481                       |
| 4.40 | -619.64402      | -309.81919    | -0.00563         | -14.78484                       | -622.16898      | -311.07815    | -0.01268         | -33.28744                       | -622.27040      | -311.12964    | -0.01113         | -29.22327                       |

<sup>a</sup>  $E_A^{(AB)}$  is equal to  $E_B^{(AB)}$  due to the  $C_2$  symmetry

**Table S2.** Absolute energies of the dimer ( $E_{AB}^{(AB)}$  in Hartree) and monomers ( $E_A^{(AB)}$  in Hartree), calculated using the basis sets of the dimer, and interaction energies ( $\Delta E_{int}$  in Hartree and  $\text{kJ}\cdot\text{mol}^{-1}$ ) as a function of the  $\text{Au}^{\text{III}}\cdots\text{Au}^{\text{III}}$  distance ( $R$  in Å) for molecule **2** at the RHF and RI-MP2 levels of theory

| $R$  | RHF             |               |                  |                                 | RI-MP2          |               |                  |                                 |
|------|-----------------|---------------|------------------|---------------------------------|-----------------|---------------|------------------|---------------------------------|
|      | $E_{AB}^{(AB)}$ | $E_A^{(AB)a}$ | $\Delta E_{int}$ |                                 | $E_{AB}^{(AB)}$ | $E_A^{(AB)a}$ | $\Delta E_{int}$ |                                 |
|      |                 |               | Ha               | $\text{kJ}\cdot\text{mol}^{-1}$ |                 |               | Ha               | $\text{kJ}\cdot\text{mol}^{-1}$ |
| 2.80 | -1576.07221     | -788.11115    | 0.15008          | 394.04641                       | -1582.13373     | -791.10468    | 0.07563          | 198.55535                       |
| 3.00 | -1576.10115     | -788.11098    | 0.12081          | 317.19452                       | -1582.14128     | -791.10302    | 0.06476          | 170.02780                       |
| 3.20 | -1576.11722     | -788.11083    | 0.10444          | 274.19763                       | -1582.14134     | -791.10167    | 0.06201          | 162.79780                       |
| 3.40 | -1576.12642     | -788.11069    | 0.09496          | 249.30873                       | -1582.13846     | -791.10055    | 0.06265          | 164.48019                       |
| 3.60 | -1576.13196     | -788.11056    | 0.08917          | 234.10756                       | -1582.13482     | -791.09962    | 0.06443          | 169.15321                       |
| 3.80 | -1576.13556     | -788.11045    | 0.08535          | 224.07625                       | -1582.13144     | -791.09887    | 0.06630          | 174.07660                       |
| 4.00 | -1576.13813     | -788.11035    | 0.08258          | 216.80266                       | -1582.12869     | -791.09826    | 0.06784          | 178.11481                       |
| 4.20 | -1576.14015     | -788.11026    | 0.08037          | 211.00690                       | -1582.12666     | -791.09778    | 0.06891          | 180.91810                       |
| 4.40 | -1576.14189     | -788.11018    | 0.07847          | 206.01451                       | -1582.12529     | -791.09740    | 0.06951          | 182.49896                       |

<sup>a</sup>  $E_A^{(AB)}$  is equal to  $E_B^{(AB)}$  due to the  $C_2$  symmetry

**Table S3.** Absolute energies of the dimer ( $E_{AB}^{(AB)}$  in Hartree) and monomers ( $E_A^{(AB)}$  in Hartree), calculated using the basis sets of the dimer, and interaction energies ( $\Delta E_{int}$  in Hartree and  $\text{kJ}\cdot\text{mol}^{-1}$ ) as a function of the  $\text{Au}^{\text{III}}\cdots\text{Au}^{\text{III}}$  distance ( $R$  in Å) for molecule **3** at the RHF and RI-MP2 levels of theory

| $R$  | RHF             |               |                  |                                 | RI-MP2          |               |                  |                                 |
|------|-----------------|---------------|------------------|---------------------------------|-----------------|---------------|------------------|---------------------------------|
|      | $E_{AB}^{(AB)}$ | $E_A^{(AB)a}$ | $\Delta E_{int}$ |                                 | $E_{AB}^{(AB)}$ | $E_A^{(AB)a}$ | $\Delta E_{int}$ |                                 |
|      |                 |               | Ha               | $\text{kJ}\cdot\text{mol}^{-1}$ |                 |               | Ha               | $\text{kJ}\cdot\text{mol}^{-1}$ |
| 2.80 | -652,37919      | -326,26611    | 0,15304          | 401,80349                       | -654,98155      | -327,54693    | 0,11231          | 294,86866                       |
| 3.00 | -652,40859      | -326,26604    | 0,12349          | 324,22802                       | -654,99833      | -327,54575    | 0,09317          | 244,60800                       |
| 3.20 | -652,42541      | -326,26598    | 0,10655          | 279,74337                       | -655,00589      | -327,54484    | 0,08378          | 219,97353                       |
| 3.40 | -652,43549      | -326,26593    | 0,09638          | 253,04309                       | -655,00908      | -327,54411    | 0,07914          | 207,77573                       |
| 3.60 | -652,44188      | -326,26589    | 0,08991          | 236,04967                       | -655,01030      | -327,54352    | 0,07674          | 201,47313                       |
| 3.80 | -652,44623      | -326,26586    | 0,08549          | 224,45177                       | -655,01075      | -327,54305    | 0,07534          | 197,81423                       |
| 4.00 | -652,44943      | -326,26583    | 0,08224          | 215,91558                       | -655,01100      | -327,54268    | 0,07435          | 195,21499                       |
| 4.20 | -652,45195      | -326,26581    | 0,07966          | 209,15084                       | -655,01128      | -327,54238    | 0,07348          | 192,91565                       |
| 4.40 | -652,45409      | -326,26579    | 0,07748          | 203,43260                       | -655,01166      | -327,54212    | 0,07259          | 190,58782                       |

<sup>a</sup>  $E_A^{(AB)}$  is equal to  $E_B^{(AB)}$  due to the  $C_2$  symmetry

**Table S4.** Absolute energies of the dimer ( $E_{AB}^{(AB)}$  in Hartree) and monomers ( $E_A^{(AB)}$ ,  $E_B^{(AB)}$  in Hartree), calculated using the basis sets of the dimer, and interaction energies ( $\Delta E_{int}$  in Hartree and  $\text{kJ}\cdot\text{mol}^{-1}$ ) as a function of the  $\text{Au}^{\text{III}}\cdots\text{Au}^{\text{III}}$  distance ( $R$  in Å) for  $[\text{Au}^{\text{III}}(\text{CH}_3)_3(\text{NH}_3)]\cdots[(\text{CH}_4)_3(\text{NH}_3)]$  at the RI-MP2 and CCSD(T) levels of theory

| $R$  | RI-MP2          |              |              |                  |                                 | CCSD(T)         |              |              |                  |                                 |
|------|-----------------|--------------|--------------|------------------|---------------------------------|-----------------|--------------|--------------|------------------|---------------------------------|
|      | $E_{AB}^{(AB)}$ | $E_A^{(AB)}$ | $E_B^{(AB)}$ | $\Delta E_{int}$ |                                 | $E_{AB}^{(AB)}$ | $E_A^{(AB)}$ | $E_B^{(AB)}$ | $\Delta E_{int}$ |                                 |
|      |                 |              |              | Ha               | $\text{kJ}\cdot\text{mol}^{-1}$ |                 |              |              | Ha               | $\text{kJ}\cdot\text{mol}^{-1}$ |
| 3.48 | -488.69537      | -311.07960   | -177.60615   | -0.00962         | -25.25260                       | -               | -            | -            | -                | -                               |
| 3.59 | -               | -            | -            | -                | -                               | -488.84876      | -311.13088   | -177.70911   | -0.00878         | -23.05709                       |

**Table S5.** Absolute energies of the dimer ( $E_{AB}^{(AB)}$  in Hartree) and monomers ( $E_A^{(AB)}$  in Hartree), calculated using the basis sets of the dimer, and interaction energies ( $\Delta E_{int}$  in Hartree and  $\text{kJ}\cdot\text{mol}^{-1}$ ) as a function of the  $\text{Au}^{\text{III}}\cdots\text{Au}^{\text{III}}$  distance ( $R$  in Å) for  $[(\text{CH}_4)_3(\text{NH}_3)]_2$  at the RI-MP2 and CCSD(T) levels of theory

| $R$  | RI-MP2          |               |                  |                                 | CCSD(T)         |               |                  |                                 |
|------|-----------------|---------------|------------------|---------------------------------|-----------------|---------------|------------------|---------------------------------|
|      | $E_{AB}^{(AB)}$ | $E_A^{(AB)a}$ | $\Delta E_{int}$ |                                 | $E_{AB}^{(AB)}$ | $E_A^{(AB)a}$ | $\Delta E_{int}$ |                                 |
|      |                 |               | Ha               | $\text{kJ}\cdot\text{mol}^{-1}$ |                 |               | Ha               | $\text{kJ}\cdot\text{mol}^{-1}$ |
| 3.48 | -355.21557      | -177.60575    | -0.00408         | -10.70597                       | -               | -             | -                | -                               |
| 3.59 | -               | -             | -                | -                               | -355.42174      | -177.70867    | -0.00440         | -11.55064                       |

<sup>a</sup>  $E_A^{(AB)}$  is equal to  $E_B^{(AB)}$  due to the  $C_2$  symmetry

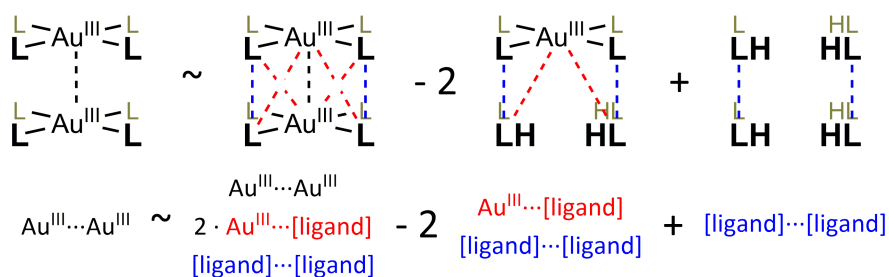

**Figure S1.** The Au<sup>III</sup>...Au<sup>III</sup> interaction energy as the difference between the total interaction energies of molecule **1**, [Au<sup>III</sup>(CH<sub>3</sub>)<sub>3</sub>(NH<sub>3</sub>)]...[(CH<sub>4</sub>)<sub>3</sub>(NH<sub>3</sub>)], and [(CH<sub>4</sub>)<sub>3</sub>(NH<sub>3</sub>)]<sub>2</sub>.

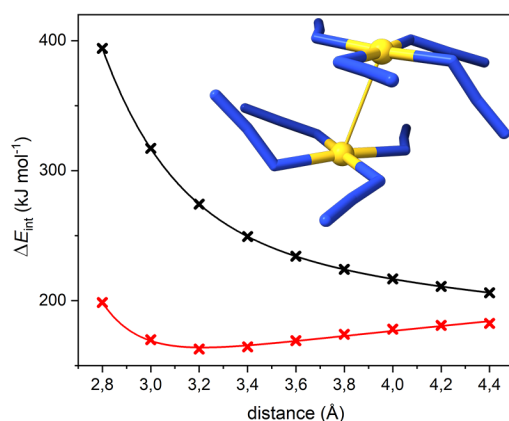

**Figure S2.** The total interaction energy as a function of the Au<sup>III</sup>...Au<sup>III</sup> distance for molecule **2**, calculated at the RHF (black) and RI-MP2 (red) levels of theory. Inset: RI-MP2/def2-TZVP optimized structure of molecule **2**; colour code: Au, yellow; N, blue.

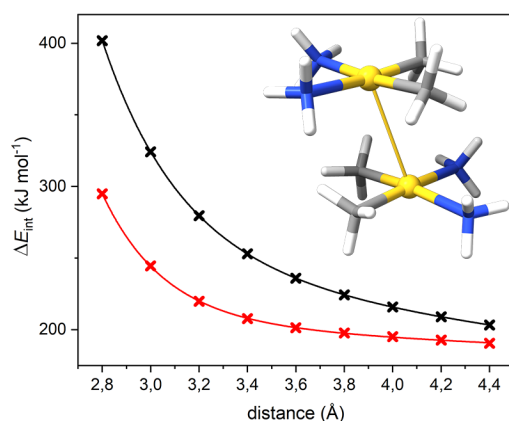

**Figure S3.** The total interaction energy as a function of the Au<sup>III</sup>...Au<sup>III</sup> distance for molecule **3**, calculated at the RHF (black) and RI-MP2 (red) levels of theory. Inset: RI-MP2/def2-TZVP optimized structure of molecule **3**; colour code: C, grey; H, white; Au, yellow; N, blue.



### 3. Energy decomposition analysis (EDA) of molecule 1.

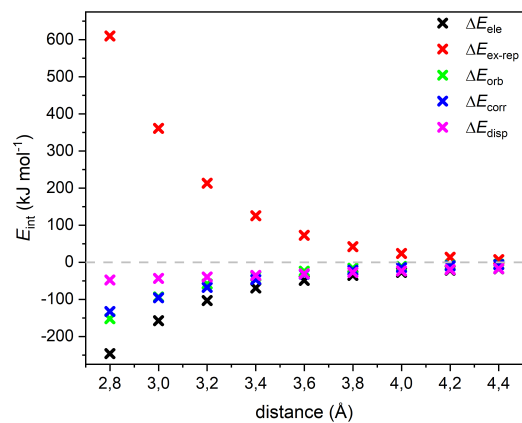

**Figure S4.** EDA contributions to the total interaction energy between the monomers of molecule **1** as a function of the Au<sup>III</sup>...Au<sup>III</sup> distance.

#### 4. Interaction region indicator (IRI) analysis of molecule 2.

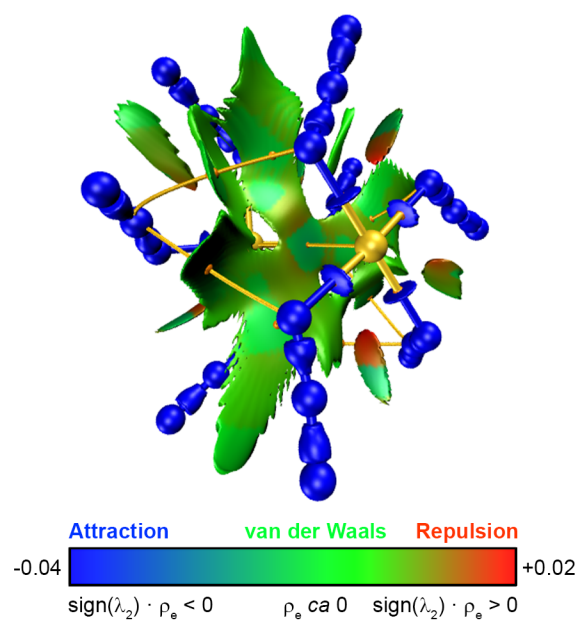

**Figure S5.** The QTAIM (3, -1) BCPs (orange dots), bond paths (yellow strings) and the IRI isosurface (isovalue = 1.0) are superimposed for molecule **2**. The RGB colour scale refers to the IRI isosurface (adapted from *Chemistry–Methods*, 2021, **1**, 231–239). Colour code: Au, yellow, N, blue.

## 5. Cartesian coordinates of molecule 1.

|    |            |            |            |
|----|------------|------------|------------|
| Au | -0.2840909 | -1.6626114 | 0.0038834  |
| Au | 0.2840909  | 1.6626114  | 0.0038834  |
| C  | -1.1406741 | -1.6882529 | -1.9091007 |
| C  | -2.0803616 | -1.9079908 | 0.8766101  |
| C  | 0.5474621  | -1.7428369 | 1.9029510  |
| C  | -0.5474621 | 1.7428369  | 1.9029510  |
| C  | 2.0803616  | 1.9079908  | 0.8766101  |
| C  | 1.1406741  | 1.6882529  | -1.9091007 |
| N  | -1.6535393 | 1.3971633  | -0.8760964 |
| N  | 1.6535393  | -1.3971633 | -0.8760964 |
| H  | -0.7108989 | 2.7885766  | 2.1839981  |
| H  | -0.1085551 | -1.2886236 | 2.6474035  |
| H  | -1.5084909 | 1.2197318  | 1.9385997  |
| H  | 0.7108989  | -2.7885766 | 2.1839981  |
| H  | 0.1085551  | 1.2886236  | 2.6474035  |
| H  | 1.5084909  | -1.2197318 | 1.9385997  |
| H  | -2.3981632 | 1.7143221  | -0.2610313 |
| H  | 1.7481261  | -1.8665163 | -1.7729021 |
| H  | -1.7481261 | 1.8665163  | -1.7729021 |
| H  | 2.3981632  | -1.7143221 | -0.2610313 |
| H  | -0.6282005 | -1.0191946 | -2.6103023 |
| H  | 2.2101068  | 1.4526800  | -1.9334602 |
| H  | 0.6282005  | 1.0191946  | -2.6103023 |
| H  | -1.0478583 | -2.7074868 | -2.3011898 |
| H  | -2.2101068 | -1.4526800 | -1.9334602 |
| H  | 1.0478583  | 2.7074868  | -2.3011898 |
| H  | -2.3736470 | -0.9567175 | 1.3268692  |
| H  | 2.8259726  | 2.2231370  | 0.1473673  |
| H  | -2.8259726 | -2.2231370 | 0.1473673  |
| H  | 1.9960736  | 2.6525242  | 1.6683523  |
| H  | 2.3736470  | 0.9567175  | 1.3268692  |
| H  | -1.9960736 | -2.6525242 | 1.6683523  |
| H  | -1.7706642 | 0.3941646  | -1.0319519 |
| H  | 1.7706642  | -0.3941646 | -1.0319519 |

$$R(\text{Au}^{\text{III}}\cdots\text{Au}^{\text{III}}) = 2.8 \text{ \AA}$$

|    |            |            |            |
|----|------------|------------|------------|
| Au | -0.2356740 | -1.3800209 | 0.0039412  |
| Au | 0.2356740  | 1.3800209  | 0.0039412  |
| C  | -1.0926741 | -1.4050209 | -1.9090588 |
| C  | -2.0316740 | -1.6250209 | 0.8769412  |
| C  | 0.5953259  | -1.4600209 | 1.9029412  |
| C  | -0.5953259 | 1.4600209  | 1.9029412  |
| C  | 2.0316740  | 1.6250209  | 0.8769412  |
| C  | 1.0926741  | 1.4050209  | -1.9090588 |
| N  | -1.7023259 | 1.1140209  | -0.8760588 |
| N  | 1.7023259  | -1.1140209 | -0.8760588 |
| H  | -0.7593259 | 2.5060209  | 2.1839412  |
| H  | -0.0606740 | -1.0060209 | 2.6469412  |
| H  | -1.5563259 | 0.9370209  | 1.9389412  |
| H  | 0.7593259  | -2.5060209 | 2.1839412  |
| H  | 0.0606740  | 1.0060209  | 2.6469412  |
| H  | 1.5563259  | -0.9370209 | 1.9389412  |
| H  | -2.4463260 | 1.4310209  | -0.2610588 |
| H  | 1.7963259  | -1.5840209 | -1.7730588 |
| H  | -1.7963259 | 1.5840209  | -1.7730588 |
| H  | 2.4463260  | -1.4310209 | -0.2610588 |
| H  | -0.5796741 | -0.7360209 | -2.6100588 |
| H  | 2.1616740  | 1.1700209  | -1.9330588 |
| H  | 0.5796741  | 0.7360209  | -2.6100588 |
| H  | -0.9996741 | -2.4240209 | -2.3010588 |
| H  | -2.1616740 | -1.1700209 | -1.9330588 |
| H  | 0.9996741  | 2.4240209  | -2.3010588 |
| H  | -2.3256740 | -0.6740209 | 1.3269412  |
| H  | 2.7776741  | 1.9400209  | 0.1469412  |
| H  | -2.7776741 | -1.9400209 | 0.1469412  |
| H  | 1.9476741  | 2.3700209  | 1.6679412  |
| H  | 2.3256740  | 0.6740209  | 1.3269412  |
| H  | -1.9476741 | -2.3700209 | 1.6679412  |
| H  | -1.8193260 | 0.1110209  | -1.0320588 |
| H  | 1.8193260  | -0.1110209 | -1.0320588 |

$$R(\text{Au}^{\text{III}}\cdots\text{Au}^{\text{III}}) = 3.0 \text{ \AA}$$

|    |            |            |            |
|----|------------|------------|------------|
| Au | -0.2516326 | -1.4787431 | 0.0039412  |
| Au | 0.2516326  | 1.4787431  | 0.0039412  |
| C  | -1.1086177 | -1.5042503 | -1.9090588 |
| C  | -2.0474873 | -1.7248061 | 0.8769412  |
| C  | 0.5794146  | -1.5582511 | 1.9029412  |
| C  | -0.5794146 | 1.5582511  | 1.9029412  |
| C  | 2.0474873  | 1.7248061  | 0.8769412  |
| C  | 1.1086177  | 1.5042503  | -1.9090588 |
| N  | -1.6862096 | 1.2115959  | -0.8760588 |
| N  | 1.6862096  | -1.2115959 | -0.8760588 |
| H  | -0.7440337 | 2.6041539  | 2.1839412  |
| H  | -0.0768540 | -1.1046395 | 2.6469412  |
| H  | -1.5401048 | 1.0346824  | 1.9389412  |
| H  | 0.7440337  | -2.6041539 | 2.1839412  |
| H  | 0.0768540  | 1.1046395  | 2.6469412  |
| H  | 1.5401048  | -1.0346824 | 1.9389412  |
| H  | -2.4303971 | 1.5281555  | -0.2610588 |
| H  | 1.7804878  | -1.6815402 | -1.7730588 |
| H  | -1.7804878 | 1.6815402  | -1.7730588 |
| H  | 2.4303971  | -1.5281555 | -0.2610588 |
| H  | -0.5960138 | -0.8349468 | -2.6100588 |
| H  | 2.1777566  | 1.2698832  | -1.9330588 |
| H  | 0.5960138  | 0.8349468  | -2.6100588 |
| H  | -1.0150145 | -2.5231951 | -2.3010588 |
| H  | -2.1777566 | -1.2698832 | -1.9330588 |
| H  | 1.0150145  | 2.5231951  | -2.3010588 |
| H  | -2.3420502 | -0.7739803 | 1.3269412  |
| H  | 2.7933007  | 2.0402477  | 0.1469412  |
| H  | -2.7933007 | -2.0402477 | 0.1469412  |
| H  | 1.9630463  | 2.4697563  | 1.6679412  |
| H  | 2.3420502  | 0.7739803  | 1.3269412  |
| H  | -1.9630463 | -2.4697563 | 1.6679412  |
| H  | -1.8026158 | 0.2085268  | -1.0320588 |
| H  | 1.8026158  | -0.2085268 | -1.0320588 |

$$R(\text{Au}^{\text{III}}\dots\text{Au}^{\text{III}}) = 3.2 \text{ \AA}$$

|    |            |            |            |
|----|------------|------------|------------|
| Au | -0.2675251 | -1.5774759 | 0.0039412  |
| Au | 0.2675251  | 1.5774759  | 0.0039412  |
| C  | -1.1244958 | -1.6034629 | -1.9090588 |
| C  | -2.0632418 | -1.8245443 | 0.8769412  |
| C  | 0.5635665  | -1.6565188 | 1.9029412  |
| C  | -0.5635665 | 1.6565188  | 1.9029412  |
| C  | 2.0632418  | 1.8245443  | 0.8769412  |
| C  | 1.1244958  | 1.6034629  | -1.9090588 |
| N  | -1.6701672 | 1.3092441  | -0.8760588 |
| N  | 1.6701672  | -1.3092441 | -0.8760588 |
| H  | -0.7287711 | 2.7023292  | 2.1839412  |
| H  | -0.0929560 | -1.2032746 | 2.6469412  |
| H  | -1.5239635 | 1.1324123  | 1.9389412  |
| H  | 0.7287711  | -2.7023292 | 2.1839412  |
| H  | 0.0929560  | 1.2032746  | 2.6469412  |
| H  | 1.5239635  | -1.1324123 | 1.9389412  |
| H  | -2.4145318 | 1.6253870  | -0.2610588 |
| H  | 1.7647085  | -1.7791355 | -1.7730588 |
| H  | -1.7647085 | 1.7791355  | -1.7730588 |
| H  | 2.4145318  | -1.6253870 | -0.2610588 |
| H  | -0.6122666 | -0.9338726 | -2.6100588 |
| H  | 2.1937657  | 1.3696943  | -1.9330588 |
| H  | 0.6122666  | 0.9338726  | -2.6100588 |
| H  | -1.0303222 | -2.6223552 | -2.3010588 |
| H  | -2.1937657 | -1.3696943 | -1.9330588 |
| H  | 1.0303222  | 2.6223552  | -2.3010588 |
| H  | -2.3583369 | -0.8738835 | 1.3269412  |
| H  | 2.8088785  | 2.1404033  | 0.1469412  |
| H  | -2.8088785 | -2.1404033 | 0.1469412  |
| H  | 1.9783838  | 2.5694470  | 1.6679412  |
| H  | 2.3583369  | 0.8738835  | 1.3269412  |
| H  | -1.9783838 | -2.5694470 | 1.6679412  |
| H  | -1.7860120 | 0.3061100  | -1.0320588 |
| H  | 1.7860120  | -0.3061100 | -1.0320588 |

$$R(\text{Au}^{\text{III}}\cdots\text{Au}^{\text{III}}) = 3.4 \text{ \AA}$$

|    |            |            |            |
|----|------------|------------|------------|
| Au | -0.2833620 | -1.6762178 | 0.0039412  |
| Au | 0.2833620  | 1.6762178  | 0.0039412  |
| C  | -1.1403188 | -1.7026565 | -1.9090588 |
| C  | -2.0789481 | -1.9242326 | 0.8769412  |
| C  | 0.5477712  | -1.7548226 | 1.9029412  |
| C  | -0.5477712 | 1.7548226  | 1.9029412  |
| C  | 2.0789481  | 1.9242326  | 0.8769412  |
| C  | 1.1403188  | 1.7026565  | -1.9090588 |
| N  | -1.6541887 | 1.4069646  | -0.8760588 |
| N  | 1.6541887  | -1.4069646 | -0.8760588 |
| H  | -0.7135270 | 2.8005458  | 2.1839412  |
| H  | -0.1089901 | -1.3019245 | 2.6469412  |
| H  | -1.5078918 | 1.2302099  | 1.9389412  |
| H  | 0.7135270  | -2.8005458 | 2.1839412  |
| H  | 0.1089901  | 1.3019245  | 2.6469412  |
| H  | 1.5078918  | -1.2302099 | 1.9389412  |
| H  | -2.3987199 | 1.7227151  | -0.2610588 |
| H  | 1.7489777  | -1.8768061 | -1.7730588 |
| H  | -1.7489777 | 1.8768061  | -1.7730588 |
| H  | 2.3987199  | -1.7227151 | -0.2610588 |
| H  | -0.6284426 | -1.0327962 | -2.6100588 |
| H  | 2.2097118  | 1.4694515  | -1.9330588 |
| H  | 0.6284426  | 1.0327962  | -2.6100588 |
| H  | -1.0456082 | -2.7214989 | -2.3010588 |
| H  | -2.2097118 | -1.4694515 | -1.9330588 |
| H  | 1.0456082  | 2.7214989  | -2.3010588 |
| H  | -2.3745443 | -0.9737275 | 1.3269412  |
| H  | 2.8244182  | 2.2404845  | 0.1469412  |
| H  | -2.8244182 | -2.2404845 | 0.1469412  |
| H  | 1.9936975  | 2.6690905  | 1.6679412  |
| H  | 2.3745443  | 0.9737275  | 1.3269412  |
| H  | -1.9936975 | -2.6690905 | 1.6679412  |
| H  | -1.7695047 | 0.4037696  | -1.0320588 |
| H  | 1.7695047  | -0.4037696 | -1.0320588 |

$$R(\text{Au}^{\text{III}}\cdots\text{Au}^{\text{III}}) = 3.6 \text{ \AA}$$

|    |            |            |            |
|----|------------|------------|------------|
| Au | -0.2991525 | -1.7749670 | 0.0039412  |
| Au | 0.2991525  | 1.7749670  | 0.0039412  |
| C  | -1.1560961 | -1.8018295 | -1.9090588 |
| C  | -2.0946158 | -2.0238698 | 0.8769412  |
| C  | 0.5320194  | -1.8531607 | 1.9029412  |
| C  | -0.5320194 | 1.8531607  | 1.9029412  |
| C  | 2.0946158  | 2.0238698  | 0.8769412  |
| C  | 1.1560961  | 1.8018295  | -1.9090588 |
| N  | -1.6382648 | 1.5047556  | -0.8760588 |
| N  | 1.6382648  | -1.5047556 | -0.8760588 |
| H  | -0.6982924 | 2.8988018  | 2.1839412  |
| H  | -0.1249658 | -1.4005875 | 2.6469412  |
| H  | -1.4918805 | 1.3280733  | 1.9389412  |
| H  | 0.6982924  | -2.8988018 | 2.1839412  |
| H  | 0.1249658  | 1.4005875  | 2.6469412  |
| H  | 1.4918805  | -1.3280733 | 1.9389412  |
| H  | -2.3829520 | 1.8201378  | -0.2610588 |
| H  | 1.7332861  | -1.9745502 | -1.7730588 |
| H  | -1.7332861 | 1.9745502  | -1.7730588 |
| H  | 2.3829520  | -1.8201378 | -0.2610588 |
| H  | -0.6445513 | -1.1317162 | -2.6100588 |
| H  | 2.2256044  | 1.5691534  | -1.9330588 |
| H  | 0.6445513  | 1.1317162  | -2.6100588 |
| H  | -1.0608817 | -2.8206250 | -2.3010588 |
| H  | -2.2256044 | -1.5691534 | -1.9330588 |
| H  | 1.0608817  | 2.8206250  | -2.3010588 |
| H  | -2.3906820 | -1.0735110 | 1.3269412  |
| H  | 2.8399294  | 2.3404904  | 0.1469412  |
| H  | -2.8399294 | -2.3404904 | 0.1469412  |
| H  | 2.0089968  | 2.7686855  | 1.6679412  |
| H  | 2.3906820  | 1.0735110  | 1.3269412  |
| H  | -2.0089968 | -2.7686855 | 1.6679412  |
| H  | -1.7530846 | 0.5015037  | -1.0320588 |
| H  | 1.7530846  | -0.5015037 | -1.0320588 |



$$R(\text{Au}^{\text{III}}\cdots\text{Au}^{\text{III}}) = 3.8 \text{ \AA}$$

|    |            |            |            |
|----|------------|------------|------------|
| Au | -0.3149050 | -1.8737222 | 0.0039412  |
| Au | 0.3149050  | 1.8737222  | 0.0039412  |
| C  | -1.1718361 | -1.9009813 | -1.9090588 |
| C  | -2.1102529 | -2.1234559 | 0.8769412  |
| C  | 0.5163030  | -1.9515313 | 1.9029412  |
| C  | -0.5163030 | 1.9515313  | 1.9029412  |
| C  | 2.1102529  | 2.1234559  | 0.8769412  |
| C  | 1.1718361  | 1.9009813  | -1.9090588 |
| N  | -1.6223870 | 1.6026142  | -0.8760588 |
| N  | 1.6223870  | -1.6026142 | -0.8760588 |
| H  | -0.6830598 | 2.9970953  | 2.1839412  |
| H  | -0.1408915 | -1.4992622 | 2.6469412  |
| H  | -1.4759209 | 1.4259997  | 1.9389412  |
| H  | 0.6830598  | -2.9970953 | 2.1839412  |
| H  | 0.1408915  | 1.4992622  | 2.6469412  |
| H  | 1.4759209  | -1.4259997 | 1.9389412  |
| H  | -2.3672201 | 1.9176518  | -0.2610588 |
| H  | 1.7176257  | -2.0723648 | -1.7730588 |
| H  | -1.7176257 | 2.0723648  | -1.7730588 |
| H  | 2.3672201  | -1.9176518 | -0.2610588 |
| H  | -0.6606015 | -1.2306313 | -2.6100588 |
| H  | 2.2414519  | 1.6688002  | -1.9330588 |
| H  | 0.6606015  | 1.2306313  | -2.6100588 |
| H  | -1.0761502 | -2.9197326 | -2.3010588 |
| H  | -2.2414519 | -1.6688002 | -1.9330588 |
| H  | 1.0761502  | 2.9197326  | -2.3010588 |
| H  | -2.4067589 | -1.1732342 | 1.3269412  |
| H  | 2.8554199  | 2.4404214  | 0.1469412  |
| H  | -2.8554199 | -2.4404214 | 0.1469412  |
| H  | 2.0242893  | 2.8682319  | 1.6679412  |
| H  | 2.4067589  | 1.1732342  | 1.3269412  |
| H  | -2.0242893 | -2.8682319 | 1.6679412  |
| H  | -1.7367426 | 0.5993093  | -1.0320588 |
| H  | 1.7367426  | -0.5993093 | -1.0320588 |

$$R(\text{Au}^{\text{III}}\cdots\text{Au}^{\text{III}}) = 4.0 \text{ \AA}$$

|    |            |            |            |
|----|------------|------------|------------|
| Au | -0.3306268 | -1.9724822 | 0.0039412  |
| Au | 0.3306268  | 1.9724822  | 0.0039412  |
| C  | -1.1875460 | -2.0001115 | -1.9090588 |
| C  | -2.1258666 | -2.2229915 | 0.8769412  |
| C  | 0.5006148  | -2.0499321 | 1.9029412  |
| C  | -0.5006148 | 2.0499321  | 1.9029412  |
| C  | 2.1258666  | 2.2229915  | 0.8769412  |
| C  | 1.1875460  | 2.0001115  | -1.9090588 |
| N  | -1.6065480 | 1.7005372  | -0.8760588 |
| N  | 1.6065480  | -1.7005372 | -0.8760588 |
| H  | -0.6678234 | 3.0954240  | 2.1839412  |
| H  | -0.1567751 | -1.5979470 | 2.6469412  |
| H  | -1.4600056 | 1.5239860  | 1.9389412  |
| H  | 0.6678234  | -3.0954240 | 2.1839412  |
| H  | 0.1567751  | 1.5979470  | 2.6469412  |
| H  | 1.4600056  | -1.5239860 | 1.9389412  |
| H  | -2.3515171 | 2.0152530  | -0.2610588 |
| H  | 1.7019896  | -2.1702466 | -1.7730588 |
| H  | -1.7019896 | 2.1702466  | -1.7730588 |
| H  | 2.3515171  | -2.0152530 | -0.2610588 |
| H  | -0.6766011 | -1.3295407 | -2.6100588 |
| H  | 2.2572620  | 1.7683925  | -1.9330588 |
| H  | 0.6766011  | 1.3295407  | -2.6100588 |
| H  | -1.0914200 | -3.0188214 | -2.3010588 |
| H  | -2.2572620 | -1.7683925 | -1.9330588 |
| H  | 1.0914200  | 3.0188214  | -2.3010588 |
| H  | -2.4227831 | -1.2728981 | 1.3269412  |
| H  | 2.8708966  | 2.5402789  | 0.1469412  |
| H  | -2.8708966 | -2.5402789 | 0.1469412  |
| H  | 2.0395812  | 2.9677303  | 1.6679412  |
| H  | 2.4227831  | 1.2728981  | 1.3269412  |
| H  | -2.0395812 | -2.9677303 | 1.6679412  |
| H  | -1.7204700 | 0.6971830  | -1.0320588 |
| H  | 1.7204700  | -0.6971830 | -1.0320588 |

$$R(\text{Au}^{\text{III}}\cdots\text{Au}^{\text{III}}) = 4.2 \text{ \AA}$$

|    |            |            |            |
|----|------------|------------|------------|
| Au | -0.3463240 | -2.0712459 | 0.0039412  |
| Au | 0.3463240  | 2.0712459  | 0.0039412  |
| C  | -1.2032321 | -2.0992204 | -1.9090588 |
| C  | -2.1414628 | -2.3224782 | 0.8769412  |
| C  | 0.4849486  | -2.1483611 | 1.9029412  |
| C  | -0.4849486 | 2.1483611  | 1.9029412  |
| C  | 2.1414628  | 2.3224782  | 0.8769412  |
| C  | 1.2032321  | 2.0992204  | -1.9090588 |
| N  | -1.5907410 | 1.7985209  | -0.8760588 |
| N  | 1.5907410  | -1.7985209 | -0.8760588 |
| H  | -0.6525782 | 3.1937856  | 2.1839412  |
| H  | -0.1726232 | -1.6966408 | 2.6469412  |
| H  | -1.4441276 | 1.6220287  | 1.9389412  |
| H  | 0.6525782  | -3.1937856 | 2.1839412  |
| H  | 0.1726232  | 1.6966408  | 2.6469412  |
| H  | 1.4441276  | -1.6220287 | 1.9389412  |
| H  | -2.3358368 | 2.1129366  | -0.2610588 |
| H  | 1.6863718  | -2.2681918 | -1.7730588 |
| H  | -1.6863718 | 2.2681918  | -1.7730588 |
| H  | 2.3358368  | -2.1129366 | -0.2610588 |
| H  | -0.6925572 | -1.4284438 | -2.6100588 |
| H  | 2.2730413  | 1.8679322  | -1.9330588 |
| H  | 0.6925572  | 1.4284438  | -2.6100588 |
| H  | -1.1066958 | -3.1178914 | -2.3010588 |
| H  | -2.2730413 | -1.8679322 | -1.9330588 |
| H  | 1.1066958  | 3.1178914  | -2.3010588 |
| H  | -2.4387619 | -1.3725044 | 1.3269412  |
| H  | 2.8863650  | 2.6400656  | 0.1469412  |
| H  | -2.8863650 | -2.6400656 | 0.1469412  |
| H  | 2.0548775  | 3.0671822  | 1.6679412  |
| H  | 2.4387619  | 1.3725044  | 1.3269412  |
| H  | -2.0548775 | -3.0671822 | 1.6679412  |
| H  | -1.7042590 | 0.7951208  | -1.0320588 |
| H  | 1.7042590  | -0.7951208 | -1.0320588 |

$$R(\text{Au}^{\text{III}}\cdots\text{Au}^{\text{III}}) = 4.4 \text{ \AA}$$

|    |            |            |            |
|----|------------|------------|------------|
| Au | -0.3620022 | -2.1700125 | 0.0039412  |
| Au | 0.3620022  | 2.1700125  | 0.0039412  |
| C  | -1.2188997 | -2.1983082 | -1.9090588 |
| C  | -2.1570467 | -2.4219178 | 0.8769412  |
| C  | 0.4692994  | -2.2468161 | 1.9029412  |
| C  | -0.4692994 | 2.2468161  | 1.9029412  |
| C  | 2.1570467  | 2.4219178  | 0.8769412  |
| C  | 1.2188997  | 2.1983082  | -1.9090588 |
| N  | -1.5749605 | 1.8965613  | -0.8760588 |
| N  | 1.5749605  | -1.8965613 | -0.8760588 |
| H  | -0.6373209 | 3.2921776  | 2.1839412  |
| H  | -0.1884418 | -1.7953423 | 2.6469412  |
| H  | -1.4282809 | 1.7201241  | 1.9389412  |
| H  | 0.6373209  | -3.2921776 | 2.1839412  |
| H  | 0.1884418  | 1.7953423  | 2.6469412  |
| H  | 1.4282809  | -1.7201241 | 1.9389412  |
| H  | -2.3201741 | 2.2106977  | -0.2610588 |
| H  | 1.6707674  | -2.3661964 | -1.7730588 |
| H  | -1.6707674 | 2.3661964  | -1.7730588 |
| H  | 2.3201741  | -2.2106977 | -0.2610588 |
| H  | -0.7084763 | -1.5273403 | -2.6100588 |
| H  | 2.2887955  | 1.9674211  | -1.9330588 |
| H  | 0.7084763  | 1.5273403  | -2.6100588 |
| H  | -1.1219815 | -3.2169430 | -2.3010588 |
| H  | -2.2887955 | -1.9674211 | -1.9330588 |
| H  | 1.1219815  | 3.2169430  | -2.3010588 |
| H  | -2.4547018 | -1.4720555 | 1.3269412  |
| H  | 2.9018297  | 2.7397844  | 0.1469412  |
| H  | -2.9018297 | -2.7397844 | 0.1469412  |
| H  | 2.0701822  | 3.1665892  | 1.6679412  |
| H  | 2.4547018  | 1.4720555  | 1.3269412  |
| H  | -2.0701822 | -3.1665892 | 1.6679412  |
| H  | -1.6881023 | 0.8931188  | -1.0320588 |
| H  | 1.6881023  | -0.8931188 | -1.0320588 |

## 6. Cartesian coordinates of molecule 2.

|    |            |            |            |
|----|------------|------------|------------|
| Au | 0.1866268  | -1.5365107 | -0.0029950 |
| N  | -0.5780727 | -1.9576709 | -1.8102537 |
| N  | 1.1366838  | -1.1267214 | 1.7408085  |
| N  | 0.5632619  | -1.4579206 | 2.7651548  |
| N  | -2.4449519 | -1.7163414 | 0.9394250  |
| N  | -1.7822505 | -2.1406922 | -1.8905681 |
| N  | -1.3729930 | -2.3051820 | 1.0014100  |
| N  | 1.8911514  | -0.8877992 | -0.8952554 |
| N  | 1.9235083  | -0.9140363 | -2.1142901 |
| N  | -2.9163105 | -2.3328916 | -2.1006468 |
| N  | 2.0689890  | -0.8946993 | -3.2750239 |
| N  | 0.1071488  | -1.7315756 | 3.8074700  |
| N  | -3.5219527 | -1.2706566 | 0.9679769  |
| Au | -0.1866268 | 1.5365107  | -0.0029950 |
| N  | 1.3729930  | 2.3051820  | 1.0014100  |
| N  | 2.4449519  | 1.7163414  | 0.9394250  |
| N  | 1.7822505  | 2.1406922  | -1.8905681 |
| N  | -1.1366838 | 1.1267214  | 1.7408085  |
| N  | -1.9235083 | 0.9140363  | -2.1142901 |
| N  | -0.5632619 | 1.4579206  | 2.7651548  |
| N  | -1.8911514 | 0.8877992  | -0.8952554 |
| N  | 0.5780727  | 1.9576709  | -1.8102537 |
| N  | 3.5219527  | 1.2706566  | 0.9679769  |
| N  | -2.0689890 | 0.8946993  | -3.2750239 |
| N  | 2.9163105  | 2.3328916  | -2.1006468 |
| N  | -0.1071488 | 1.7315756  | 3.8074700  |

$$R(\text{Au}^{\text{III}}\cdots\text{Au}^{\text{III}}) = 2.8 \text{ \AA}$$

|    |            |            |            |
|----|------------|------------|------------|
| Au | 0.1876907  | -1.3873616 | -0.0029950 |
| N  | -0.5712103 | -1.8188827 | -1.8102537 |
| N  | 1.1320868  | -0.9646896 | 1.7408085  |
| N  | 0.5632222  | -1.3036565 | 2.7651548  |
| N  | -2.4411989 | -1.6029649 | 0.9394250  |
| N  | -1.7727877 | -2.0182637 | -1.8905681 |
| N  | -1.3613310 | -2.1771725 | 1.0014100  |
| N  | 1.8832353  | -0.7155288 | -0.8952554 |
| N  | 1.9159460  | -0.7413234 | -2.1142901 |
| N  | -2.9041289 | -2.2258684 | -2.1006468 |
| N  | 2.0611503  | -0.7200096 | -3.2750239 |
| N  | 0.1108729  | -1.5834893 | 3.8074700  |
| N  | -3.5241614 | -1.1719684 | 0.9679769  |
| Au | -0.1876907 | 1.3873616  | -0.0029950 |
| N  | 1.3613310  | 2.1771725  | 1.0014100  |
| N  | 2.4411989  | 1.6029649  | 0.9394250  |
| N  | 1.7727877  | 2.0182637  | -1.8905681 |
| N  | -1.1320868 | 0.9646896  | 1.7408085  |
| N  | -1.9159460 | 0.7413234  | -2.1142901 |
| N  | -0.5632222 | 1.3036565  | 2.7651548  |
| N  | -1.8832353 | 0.7155288  | -0.8952554 |
| N  | 0.5712103  | 1.8188827  | -1.8102537 |
| N  | 3.5241614  | 1.1719684  | 0.9679769  |
| N  | -2.0611503 | 0.7200096  | -3.2750239 |
| N  | 2.9041289  | 2.2258684  | -2.1006468 |
| N  | -0.1108729 | 1.5834893  | 3.8074700  |

$$R(\text{Au}^{\text{III}}\cdots\text{Au}^{\text{III}}) = 3.0 \text{ \AA}$$

|    |            |            |            |
|----|------------|------------|------------|
| Au | 0.1872436  | -1.4882674 | -0.0029950 |
| N  | -0.5756436 | -1.9127014 | -1.8102537 |
| N  | 1.1355355  | -1.0744098 | 1.7408085  |
| N  | 0.5635385  | -1.4080637 | 2.7651548  |
| N  | -2.4435401 | -1.6793760 | 0.9394250  |
| N  | -1.7790259 | -2.1008824 | -1.8905681 |
| N  | -1.3690671 | -2.2636165 | 1.0014100  |
| N  | 1.8889721  | -0.8322559 | -0.8952554 |
| N  | 1.9214412  | -0.8583541 | -2.1142901 |
| N  | -2.9122517 | -2.2979408 | -2.1006468 |
| N  | 2.0668376  | -0.8383936 | -3.2750239 |
| N  | 0.1086024  | -1.6836711 | 3.8074700  |
| N  | -3.5224412 | -1.2383115 | 0.9679769  |
| Au | -0.1872436 | 1.4882674  | -0.0029950 |
| N  | 1.3690671  | 2.2636165  | 1.0014100  |
| N  | 2.4435401  | 1.6793760  | 0.9394250  |
| N  | 1.7790259  | 2.1008824  | -1.8905681 |
| N  | -1.1355355 | 1.0744098  | 1.7408085  |
| N  | -1.9214412 | 0.8583541  | -2.1142901 |
| N  | -0.5635385 | 1.4080637  | 2.7651548  |
| N  | -1.8889721 | 0.8322559  | -0.8952554 |
| N  | 0.5756436  | 1.9127014  | -1.8102537 |
| N  | 3.5224412  | 1.2383115  | 0.9679769  |
| N  | -2.0668376 | 0.8383936  | -3.2750239 |
| N  | 2.9122517  | 2.2979408  | -2.1006468 |
| N  | -0.1086024 | 1.6836711  | 3.8074700  |

$$R(\text{Au}^{\text{III}}\cdots\text{Au}^{\text{III}}) = 3.2 \text{ \AA}$$

|    |            |            |            |
|----|------------|------------|------------|
| Au | 0.1856846  | -1.5891889 | 0.0636810  |
| N  | -0.5809251 | -2.0068620 | -1.7435778 |
| N  | 1.1375981  | -1.1837308 | 1.8074845  |
| N  | 0.5626738  | -1.5123149 | 2.8318308  |
| N  | -2.4466858 | -1.7570326 | 1.0061010  |
| N  | -1.7859239 | -2.1843971 | -1.8238921 |
| N  | -1.3774198 | -2.3507491 | 1.0680860  |
| N  | 1.8931460  | -0.9482471 | -0.8285794 |
| N  | 1.9253831  | -0.9746313 | -2.0476141 |
| N  | -2.9208475 | -2.3714296 | -2.0339708 |
| N  | 2.0709503  | -0.9559570 | -3.2083479 |
| N  | 0.1053190  | -1.7838897 | 3.8741460  |
| N  | -3.5216456 | -1.3064473 | 1.0346529  |
| Au | -0.1856846 | 1.5891889  | 0.0636810  |
| N  | 1.3774198  | 2.3507491  | 1.0680860  |
| N  | 2.4466858  | 1.7570326  | 1.0061010  |
| N  | 1.7859239  | 2.1843971  | -1.8238921 |
| N  | -1.1375981 | 1.1837308  | 1.8074845  |
| N  | -1.9253831 | 0.9746313  | -2.0476141 |
| N  | -0.5626738 | 1.5123149  | 2.8318308  |
| N  | -1.8931460 | 0.9482471  | -0.8285794 |
| N  | 0.5809251  | 2.0068620  | -1.7435778 |
| N  | 3.5216456  | 1.3064473  | 1.0346529  |
| N  | -2.0709503 | 0.9559570  | -3.2083479 |
| N  | 2.9208475  | 2.3714296  | -2.0339708 |
| N  | -0.1053190 | 1.7838897  | 3.8741460  |



$$R(\text{Au}^{\text{III}}\cdots\text{Au}^{\text{III}}) = 3.4 \text{ \AA}$$

|    |            |            |            |
|----|------------|------------|------------|
| Au | 0.1831768  | -1.6901024 | -0.0029950 |
| N  | -0.5868954 | -2.1013566 | -1.8102537 |
| N  | 1.1384444  | -1.2926110 | 1.7408085  |
| N  | 0.5607951  | -1.6163806 | 2.7651548  |
| N  | -2.4505039 | -1.8359489 | 0.9394250  |
| N  | -1.7933354 | -2.2688187 | -1.8905681 |
| N  | -1.3862352 | -2.4385776 | 1.0014100  |
| N  | 1.8959332  | -1.0634476 | -0.8952554 |
| N  | 1.9279487  | -1.0901001 | -2.1142901 |
| N  | -2.9297818 | -2.4463632 | -2.1006468 |
| N  | 2.0736669  | -1.0726426 | -3.2750239 |
| N  | 0.1011874  | -1.8841251 | 3.8074700  |
| N  | -3.5216619 | -1.3763989 | 0.9679769  |
| Au | -0.1831768 | 1.6901024  | -0.0029950 |
| N  | 1.3862352  | 2.4385776  | 1.0014100  |
| N  | 2.4505039  | 1.8359489  | 0.9394250  |
| N  | 1.7933354  | 2.2688187  | -1.8905681 |
| N  | -1.1384444 | 1.2926110  | 1.7408085  |
| N  | -1.9279487 | 1.0901001  | -2.1142901 |
| N  | -0.5607951 | 1.6163806  | 2.7651548  |
| N  | -1.8959332 | 1.0634476  | -0.8952554 |
| N  | 0.5868954  | 2.1013566  | -1.8102537 |
| N  | 3.5216619  | 1.3763989  | 0.9679769  |
| N  | -2.0736669 | 1.0726426  | -3.2750239 |
| N  | 2.9297818  | 2.4463632  | -2.1006468 |
| N  | -0.1011874 | 1.8841251  | 3.8074700  |

$$R(\text{Au}^{\text{III}}\cdots\text{Au}^{\text{III}}) = 3.6 \text{ \AA}$$

|    |            |            |            |
|----|------------|------------|------------|
| Au | 0.1798705  | -1.7909904 | -0.0029950 |
| N  | -0.5934127 | -2.1961748 | -1.8102537 |
| N  | 1.1382350  | -1.4010249 | 1.7408085  |
| N  | 0.5580569  | -1.7202410 | 2.7651548  |
| N  | -2.4548760 | -1.9161172 | 0.9394250  |
| N  | -1.8011325 | -2.3541425 | -1.8905681 |
| N  | -1.3953802 | -2.5270982 | 1.0014100  |
| N  | 1.8975028  | -1.1778266 | -0.8952554 |
| N  | 1.9293077  | -1.2047302 | -2.1142901 |
| N  | -2.9389403 | -2.5227429 | -2.1006468 |
| N  | 2.0751587  | -1.1884193 | -3.2750239 |
| N  | 0.0963575  | -1.9843622 | 3.8074700  |
| N  | -3.5223862 | -1.4481562 | 0.9679769  |
| Au | -0.1798705 | 1.7909904  | -0.0029950 |
| N  | 1.3953802  | 2.5270982  | 1.0014100  |
| N  | 2.4548760  | 1.9161172  | 0.9394250  |
| N  | 1.8011325  | 2.3541425  | -1.8905681 |
| N  | -1.1382350 | 1.4010249  | 1.7408085  |
| N  | -1.9293077 | 1.2047302  | -2.1142901 |
| N  | -0.5580569 | 1.7202410  | 2.7651548  |
| N  | -1.8975028 | 1.1778266  | -0.8952554 |
| N  | 0.5934127  | 2.1961748  | -1.8102537 |
| N  | 3.5223862  | 1.4481562  | 0.9679769  |
| N  | -2.0751587 | 1.1884193  | -3.2750239 |
| N  | 2.9389403  | 2.5227429  | -2.1006468 |
| N  | -0.0963575 | 1.9843622  | 3.8074700  |

$$R(\text{Au}^{\text{III}}\cdots\text{Au}^{\text{III}}) = 3.8 \text{ \AA}$$

|    |            |            |            |
|----|------------|------------|------------|
| Au | 0.1759016  | -1.8918400 | -0.0029950 |
| N  | -0.6003518 | -2.2913046 | -1.8102537 |
| N  | 1.1371189  | -1.5089602 | 1.7408085  |
| N  | 0.5546000  | -1.8238845 | 2.7651548  |
| N  | -2.4596968 | -1.9975124 | 0.9394250  |
| N  | -1.8092049 | -2.4403520 | -1.8905681 |
| N  | -1.4047405 | -2.6162985 | 1.0014100  |
| N  | 1.8980138  | -1.2913733 | -0.8952554 |
| N  | 1.9296192  | -1.3185110 | -2.1142901 |
| N  | -2.9482264 | -2.6005479 | -2.1006468 |
| N  | 2.0755866  | -1.3032773 | -3.2750239 |
| N  | 0.0909633  | -2.0845900 | 3.8074700  |
| N  | -3.5237233 | -1.5216833 | 0.9679769  |
| Au | -0.1759016 | 1.8918400  | -0.0029950 |
| N  | 1.4047405  | 2.6162985  | 1.0014100  |
| N  | 2.4596968  | 1.9975124  | 0.9394250  |
| N  | 1.8092049  | 2.4403520  | -1.8905681 |
| N  | -1.1371189 | 1.5089602  | 1.7408085  |
| N  | -1.9296192 | 1.3185110  | -2.1142901 |
| N  | -0.5546000 | 1.8238845  | 2.7651548  |
| N  | -1.8980138 | 1.2913733  | -0.8952554 |
| N  | 0.6003518  | 2.2913046  | -1.8102537 |
| N  | 3.5237233  | 1.5216833  | 0.9679769  |
| N  | -2.0755866 | 1.3032773  | -3.2750239 |
| N  | 2.9482264  | 2.6005479  | -2.1006468 |
| N  | -0.0909633 | 2.0845900  | 3.8074700  |

$$R(\text{Au}^{\text{III}}\cdots\text{Au}^{\text{III}}) = 4.0 \text{ \AA}$$

|    |            |            |            |
|----|------------|------------|------------|
| Au | 0.1713915  | -1.9926427 | -0.0029950 |
| N  | -0.6076042 | -2.3867327 | -1.8102537 |
| N  | 1.1352321  | -1.6164155 | 1.7408085  |
| N  | 0.5505506  | -1.9273062 | 2.7651548  |
| N  | -2.4648743 | -2.0800966 | 0.9394250  |
| N  | -1.8174585 | -2.5274216 | -1.8905681 |
| N  | -1.4142198 | -2.7061593 | 1.0014100  |
| N  | 1.8976128  | -1.4040927 | -0.8952554 |
| N  | 1.9290299  | -1.4314481 | -2.1142901 |
| N  | -2.9575600 | -2.6797413 | -2.1006468 |
| N  | 2.0750991  | -1.4172237 | -3.2750239 |
| N  | 0.0851232  | -2.1848010 | 3.8074700  |
| N  | -3.5255866 | -1.5969249 | 0.9679769  |
| Au | -0.1713915 | 1.9926427  | -0.0029950 |
| N  | 1.4142198  | 2.7061593  | 1.0014100  |
| N  | 2.4648743  | 2.0800966  | 0.9394250  |
| N  | 1.8174585  | 2.5274216  | -1.8905681 |
| N  | -1.1352321 | 1.6164155  | 1.7408085  |
| N  | -1.9290299 | 1.4314481  | -2.1142901 |
| N  | -0.5505506 | 1.9273062  | 2.7651548  |
| N  | -1.8976128 | 1.4040927  | -0.8952554 |
| N  | 0.6076042  | 2.3867327  | -1.8102537 |
| N  | 3.5255866  | 1.5969249  | 0.9679769  |
| N  | -2.0750991 | 1.4172237  | -3.2750239 |
| N  | 2.9575600  | 2.6797413  | -2.1006468 |
| N  | -0.0851232 | 2.1848010  | 3.8074700  |

$$R(\text{Au}^{\text{III}}\cdots\text{Au}^{\text{III}}) = 4.2 \text{ \AA}$$

|    |            |            |            |
|----|------------|------------|------------|
| Au | 0.1664475  | -2.0933932 | -0.0029950 |
| N  | -0.6150766 | -2.4824451 | -1.8102537 |
| N  | 1.1326973  | -1.7233974 | 1.7408085  |
| N  | 0.5460205  | -2.0305063 | 2.7651548  |
| N  | -2.4703280 | -2.1638229 | 0.9394250  |
| N  | -1.8258142 | -2.6153189 | -1.8905681 |
| N  | -1.4237380 | -2.7966566 | 1.0014100  |
| N  | 1.8964330  | -1.5160017 | -0.8952554 |
| N  | 1.9276728  | -1.5435595 | -2.1142901 |
| N  | -2.9668754 | -2.7602738 | -2.1006468 |
| N  | 2.0738308  | -1.5302785 | -3.2750239 |
| N  | 0.0789401  | -2.2849905 | 3.8074700  |
| N  | -3.5278984 | -1.6738122 | 0.9679769  |
| Au | -0.1664475 | 2.0933932  | -0.0029950 |
| N  | 1.4237380  | 2.7966566  | 1.0014100  |
| N  | 2.4703280  | 2.1638229  | 0.9394250  |
| N  | 1.8258142  | 2.6153189  | -1.8905681 |
| N  | -1.1326973 | 1.7233974  | 1.7408085  |
| N  | -1.9276728 | 1.5435595  | -2.1142901 |
| N  | -0.5460205 | 2.0305063  | 2.7651548  |
| N  | -1.8964330 | 1.5160017  | -0.8952554 |
| N  | 0.6150766  | 2.4824451  | -1.8102537 |
| N  | 3.5278984  | 1.6738122  | 0.9679769  |
| N  | -2.0738308 | 1.5302785  | -3.2750239 |
| N  | 2.9668754  | 2.7602738  | -2.1006468 |
| N  | -0.0789401 | 2.2849905  | 3.8074700  |

$$R(\text{Au}^{\text{III}}\cdots\text{Au}^{\text{III}}) = 4.4 \text{ \AA}$$

|    |            |            |            |
|----|------------|------------|------------|
| Au | 0.1611629  | -2.1940890 | -0.0029950 |
| N  | -0.6226900 | -2.5784272 | -1.8102537 |
| N  | 1.1296235  | -1.8299190 | 1.7408085  |
| N  | 0.5411078  | -2.1334891 | 2.7651548  |
| N  | -2.4759890 | -2.2486378 | 0.9394250  |
| N  | -1.8342058 | -2.7040071 | -1.8905681 |
| N  | -1.4332290 | -2.8877630 | 1.0014100  |
| N  | 1.8945943  | -1.6271265 | -0.8952554 |
| N  | 1.9256676  | -1.6548719 | -2.1142901 |
| N  | -2.9761193 | -2.8420875 | -2.1006468 |
| N  | 2.0719029  | -1.6424714 | -3.2750239 |
| N  | 0.0725033  | -2.3851558 | 3.8074700  |
| N  | -3.5305891 | -1.7522670 | 0.9679769  |
| Au | -0.1611629 | 2.1940890  | -0.0029950 |
| N  | 1.4332290  | 2.8877630  | 1.0014100  |
| N  | 2.4759890  | 2.2486378  | 0.9394250  |
| N  | 1.8342058  | 2.7040071  | -1.8905681 |
| N  | -1.1296235 | 1.8299190  | 1.7408085  |
| N  | -1.9256676 | 1.6548719  | -2.1142901 |
| N  | -0.5411078 | 2.1334891  | 2.7651548  |
| N  | -1.8945943 | 1.6271265  | -0.8952554 |
| N  | 0.6226900  | 2.5784272  | -1.8102537 |
| N  | 3.5305891  | 1.7522670  | 0.9679769  |
| N  | -2.0719029 | 1.6424714  | -3.2750239 |
| N  | 2.9761193  | 2.8420875  | -2.1006468 |
| N  | -0.0725033 | 2.3851558  | 3.8074700  |

## 7. Cartesian coordinates of molecule 3.

|    |            |            |            |
|----|------------|------------|------------|
| Au | -0.1265006 | -1.6819570 | 0.0009972  |
| Au | 0.1265006  | 1.6819570  | 0.0009972  |
| N  | 1.2119386  | -2.3554747 | -1.5749130 |
| C  | -1.5130303 | -1.2193849 | -1.3916588 |
| C  | -1.4886569 | -1.1963392 | 1.4102227  |
| C  | 1.4886569  | 1.1963392  | 1.4102227  |
| C  | 1.5130303  | 1.2193849  | -1.3916588 |
| N  | -1.2119386 | 2.3554747  | -1.5749130 |
| N  | -1.2425384 | 2.3538906  | 1.5552478  |
| N  | 1.2425384  | -2.3538906 | 1.5552478  |
| H  | 2.1123159  | 2.0777093  | 1.5730196  |
| H  | -2.1248220 | -0.3709117 | 1.1010378  |
| H  | 0.9589881  | 0.9449567  | 2.3308182  |
| H  | -2.1123159 | -2.0777093 | 1.5730196  |
| H  | 2.1248220  | 0.3709117  | 1.1010378  |
| H  | -0.9589881 | -0.9449567 | 2.3308182  |
| H  | -1.4016517 | 1.6414678  | 2.2668473  |
| H  | 0.8271755  | -3.1505684 | 2.0414160  |
| H  | -0.8271755 | 3.1505684  | 2.0414160  |
| H  | 1.4016517  | -1.6414678 | 2.2668473  |
| H  | 2.0943067  | -1.8484550 | -1.6423713 |
| H  | -0.7638038 | 2.2688994  | -2.4873060 |
| H  | -2.0943067 | 1.8484550  | -1.6423713 |
| H  | 1.4504265  | -3.3439561 | -1.4815414 |
| H  | 0.7638038  | -2.2688994 | -2.4873060 |
| H  | -1.4504265 | 3.3439561  | -1.4815414 |
| H  | -2.3605078 | -0.6758338 | -0.9817082 |
| H  | 1.0284977  | 0.6373129  | -2.1772947 |
| H  | -1.0284977 | -0.6373129 | -2.1772947 |
| H  | 1.8699137  | 2.1674862  | -1.8005517 |
| H  | 2.3605078  | 0.6758338  | -0.9817082 |
| H  | -1.8699137 | -2.1674862 | -1.8005517 |
| H  | -2.1667355 | 2.6612539  | 1.2526848  |
| H  | 2.1667355  | -2.6612539 | 1.2526848  |

$$R(\text{Au}^{\text{III}}\cdots\text{Au}^{\text{III}}) = 2.8 \text{ \AA}$$

|    |            |            |            |
|----|------------|------------|------------|
| Au | -0.1045103 | -1.3960937 | 0.0009972  |
| Au | 0.1045103  | 1.3960937  | 0.0009972  |
| N  | 1.2341640  | -2.0691439 | -1.5749130 |
| C  | -1.4912015 | -0.9340059 | -1.3916588 |
| C  | -1.4668362 | -0.9109517 | 1.4102227  |
| C  | 1.4668362  | 0.9109517  | 1.4102227  |
| C  | 1.4912015  | 0.9340059  | -1.3916588 |
| N  | -1.2341640 | 2.0691439  | -1.5749130 |
| N  | -1.2647633 | 2.0675491  | 1.5552478  |
| N  | 1.2647633  | -2.0675491 | 1.5552478  |
| H  | 2.0901873  | 1.7925395  | 1.5730196  |
| H  | -2.1032895 | -0.0857464 | 1.1010378  |
| H  | 0.9372552  | 0.6593842  | 2.3308182  |
| H  | -2.0901873 | -1.7925395 | 1.5730196  |
| H  | 2.1032895  | 0.0857464  | 1.1010378  |
| H  | -0.9372552 | -0.6593842 | 2.3308182  |
| H  | -1.4236277 | 1.3550707  | 2.2668473  |
| H  | 0.8496787  | -2.8643719 | 2.0414160  |
| H  | -0.8496787 | 2.8643719  | 2.0414160  |
| H  | 1.4236277  | -1.3550707 | 2.2668473  |
| H  | 2.1163550  | -1.5618160 | -1.6423713 |
| H  | -0.7859990 | 1.9827251  | -2.4873060 |
| H  | -2.1163550 | 1.5618160  | -1.6423713 |
| H  | 1.4729972  | -3.0575419 | -1.4815414 |
| H  | 0.7859990  | -1.9827251 | -2.4873060 |
| H  | -1.4729972 | 3.0575419  | -1.4815414 |
| H  | -2.3388688 | -0.3907508 | -0.9817082 |
| H  | 1.0068722  | 0.3517647  | -2.1772947 |
| H  | -1.0068722 | -0.3517647 | -2.1772947 |
| H  | 1.8477537  | 1.8822318  | -1.8005517 |
| H  | 2.3388688  | 0.3907508  | -0.9817082 |
| H  | -1.8477537 | -1.8822318 | -1.8005517 |
| H  | -2.1890676 | 2.3745896  | 1.2526848  |
| H  | 2.1890676  | -2.3745896 | 1.2526848  |



$$R(\text{Au}^{\text{III}}\cdots\text{Au}^{\text{III}}) = 3.0 \text{ \AA}$$

|    |            |            |            |
|----|------------|------------|------------|
| Au | -0.1121680 | -1.4958002 | 0.0009972  |
| Au | 0.1121680  | 1.4958002  | 0.0009972  |
| N  | 1.2264196  | -2.1690228 | -1.5749130 |
| C  | -1.4987997 | -1.0335338 | -1.3916588 |
| C  | -1.4744314 | -1.0104827 | 1.4102227  |
| C  | 1.4744314  | 1.0104827  | 1.4102227  |
| C  | 1.4987997  | 1.0335338  | -1.3916588 |
| N  | -1.2264196 | 2.1690228  | -1.5749130 |
| N  | -1.2570191 | 2.1674320  | 1.5552478  |
| N  | 1.2570191  | -2.1674320 | 1.5552478  |
| H  | 2.0978960  | 1.8919903  | 1.5730196  |
| H  | -2.1107784 | -0.1851955 | 1.1010378  |
| H  | 0.9448180  | 0.7589835  | 2.3308182  |
| H  | -2.0978960 | -1.8919903 | 1.5730196  |
| H  | 2.1107784  | 0.1851955  | 1.1010378  |
| H  | -0.9448180 | -0.7589835 | 2.3308182  |
| H  | -1.4159753 | 1.4549741  | 2.2668473  |
| H  | 0.8418319  | -2.9642013 | 2.0414160  |
| H  | -0.8418319 | 2.9642013  | 2.0414160  |
| H  | 1.4159753  | -1.4549741 | 2.2668473  |
| H  | 2.1086760  | -1.6618086 | -1.6423713 |
| H  | -0.7782658 | 2.0825464  | -2.4873060 |
| H  | -2.1086760 | 1.6618086  | -1.6423713 |
| H  | 1.4651255  | -3.1574516 | -1.4815414 |
| H  | 0.7782658  | -2.0825464 | -2.4873060 |
| H  | -1.4651255 | 3.1574516  | -1.4815414 |
| H  | -2.3463970 | -0.4901696 | -0.9817082 |
| H  | 1.0143954  | 0.4513550  | -2.1772947 |
| H  | -1.0143954 | -0.4513550 | -2.1772947 |
| H  | 1.8554740  | 1.9817138  | -1.8005517 |
| H  | 2.3463970  | 0.4901696  | -0.9817082 |
| H  | -1.8554740 | -1.9817138 | -1.8005517 |
| H  | -2.1812839 | 2.4745915  | 1.2526848  |
| H  | 2.1812839  | -2.4745915 | 1.2526848  |

$$R(\text{Au}^{\text{III}}\cdots\text{Au}^{\text{III}}) = 3.2 \text{ \AA}$$

|    |            |            |            |
|----|------------|------------|------------|
| Au | -0.1198402 | -1.5955057 | 0.0009972  |
| Au | 0.1198402  | 1.5955057  | 0.0009972  |
| N  | 1.2186654  | -2.2688913 | -1.5749130 |
| C  | -1.5064156 | -1.1330704 | -1.3916588 |
| C  | -1.4820445 | -1.1100223 | 1.4102227  |
| C  | 1.4820445  | 1.1100223  | 1.4102227  |
| C  | 1.5064156  | 1.1330704  | -1.3916588 |
| N  | -1.2186654 | 2.2688913  | -1.5749130 |
| N  | -1.2492651 | 2.2673042  | 1.5552478  |
| N  | 1.2492651  | -2.2673042 | 1.5552478  |
| H  | 2.1056164  | 1.9914539  | 1.5730196  |
| H  | -2.1182909 | -0.2846576 | 1.1010378  |
| H  | 0.9524004  | 0.8585875  | 2.3308182  |
| H  | -2.1056164 | -1.9914539 | 1.5730196  |
| H  | 2.1182909  | 0.2846576  | 1.1010378  |
| H  | -0.9524004 | -0.8585875 | 2.3308182  |
| H  | -1.4083081 | 1.5548656  | 2.2668473  |
| H  | 0.8339809  | -3.0640229 | 2.0414160  |
| H  | -0.8339809 | 3.0640229  | 2.0414160  |
| H  | 1.4083081  | -1.5548656 | 2.2668473  |
| H  | 2.1009835  | -1.7617845 | -1.6423713 |
| H  | -0.7705221 | 2.1823602  | -2.4873060 |
| H  | -2.1009835 | 1.7617845  | -1.6423713 |
| H  | 1.4572509  | -3.2573491 | -1.4815414 |
| H  | 0.7705221  | -2.1823602 | -2.4873060 |
| H  | -1.4572509 | 3.2573491  | -1.4815414 |
| H  | -2.3539467 | -0.5896029 | -0.9817082 |
| H  | 1.0219404  | 0.5509505  | -2.1772947 |
| H  | -1.0219404 | -0.5509505 | -2.1772947 |
| H  | 1.8632054  | 2.0812069  | -1.8005517 |
| H  | 2.3539467  | 0.5896029  | -0.9817082 |
| H  | -1.8632054 | -2.0812069 | -1.8005517 |
| H  | -2.1734925 | 2.5745763  | 1.2526848  |
| H  | 2.1734925  | -2.5745763 | 1.2526848  |

$$R(\text{Au}^{\text{III}}\cdots\text{Au}^{\text{III}}) = 3.4 \text{ \AA}$$

|    |            |            |            |
|----|------------|------------|------------|
| Au | -0.1275254 | -1.6952101 | 0.0009972  |
| Au | 0.1275254  | 1.6952101  | 0.0009972  |
| N  | 1.2109027  | -2.3687498 | -1.5749130 |
| C  | -1.5140475 | -1.2326152 | -1.3916588 |
| C  | -1.4896738 | -1.2095699 | 1.4102227  |
| C  | 1.4896738  | 1.2095699  | 1.4102227  |
| C  | 1.5140475  | 1.2326152  | -1.3916588 |
| N  | -1.2109027 | 2.3687498  | -1.5749130 |
| N  | -1.2415026 | 2.3671663  | 1.5552478  |
| N  | 1.2415026  | -2.3671663 | 1.5552478  |
| H  | 2.1133472  | 2.0909297  | 1.5730196  |
| H  | -2.1258252 | -0.3841319 | 1.1010378  |
| H  | 0.9600008  | 0.9581961  | 2.3308182  |
| H  | -2.1133472 | -2.0909297 | 1.5730196  |
| H  | 2.1258252  | 0.3841319  | 1.1010378  |
| H  | -0.9600008 | -0.9581961 | 2.3308182  |
| H  | -1.4006276 | 1.6547460  | 2.2668473  |
| H  | 0.8261265  | -3.1638372 | 2.0414160  |
| H  | -0.8261265 | 3.1638372  | 2.0414160  |
| H  | 1.4006276  | -1.6547460 | 2.2668473  |
| H  | 2.0932792  | -1.8617447 | -1.6423713 |
| H  | -0.7627693 | 2.2821672  | -2.4873060 |
| H  | -2.0932792 | 1.8617447  | -1.6423713 |
| H  | 1.4493744  | -3.3572351 | -1.4815414 |
| H  | 0.7627693  | -2.2821672 | -2.4873060 |
| H  | -1.4493744 | 3.3572351  | -1.4815414 |
| H  | -2.3615161 | -0.6890501 | -0.9817082 |
| H  | 1.0295053  | 0.6505511  | -2.1772947 |
| H  | -1.0295053 | -0.6505511 | -2.1772947 |
| H  | 1.8709465  | 2.1807106  | -1.8005517 |
| H  | 2.3615161  | 0.6890501  | -0.9817082 |
| H  | -1.8709465 | -2.1807106 | -1.8005517 |
| H  | -2.1656945 | 2.6745448  | 1.2526848  |
| H  | 2.1656945  | -2.6745448 | 1.2526848  |

$$R(\text{Au}^{\text{III}}\cdots\text{Au}^{\text{III}}) = 3.6 \text{ \AA}$$

|    |            |            |            |
|----|------------|------------|------------|
| Au | -0.1352223 | -1.7949136 | 0.0009972  |
| Au | 0.1352223  | 1.7949136  | 0.0009972  |
| N  | 1.2031325  | -2.4685991 | -1.5749130 |
| C  | -1.5216940 | -1.3321678 | -1.3916588 |
| C  | -1.4973178 | -1.3091251 | 1.4102227  |
| C  | 1.4973178  | 1.3091251  | 1.4102227  |
| C  | 1.5216940  | 1.3321678  | -1.3916588 |
| N  | -1.2031325 | 2.4685991  | -1.5749130 |
| N  | -1.2337325 | 2.4670188  | 1.5552478  |
| N  | 1.2337325  | -2.4670188 | 1.5552478  |
| H  | 2.1210872  | 2.1904170  | 1.5730196  |
| H  | -2.1333794 | -0.4836179 | 1.1010378  |
| H  | 0.9676174  | 1.0578090  | 2.3308182  |
| H  | -2.1210872 | -2.1904170 | 1.5730196  |
| H  | 2.1333794  | 0.4836179  | 1.1010378  |
| H  | -0.9676174 | -1.0578090 | 2.3308182  |
| H  | -1.3929351 | 1.7546159  | 2.2668473  |
| H  | 0.8182698  | -3.2636445 | 2.0414160  |
| H  | -0.8182698 | 3.2636445  | 2.0414160  |
| H  | 1.3929351  | -1.7546159 | 2.2668473  |
| H  | 2.0855641  | -1.9616899 | -1.6423713 |
| H  | -0.7550086 | 2.3819676  | -2.4873060 |
| H  | -2.0855641 | 1.9616899  | -1.6423713 |
| H  | 1.4414965  | -3.4571103 | -1.4815414 |
| H  | 0.7550086  | -2.3819676 | -2.4873060 |
| H  | -1.4414965 | 3.4571103  | -1.4815414 |
| H  | -2.3691034 | -0.7885104 | -0.9817082 |
| H  | 1.0370885  | 0.7501565  | -2.1772947 |
| H  | -1.0370885 | -0.7501565 | -2.1772947 |
| H  | 1.8786962  | 2.2802244  | -1.8005517 |
| H  | 2.3691034  | 0.7885104  | -0.9817082 |
| H  | -1.8786962 | -2.2802244 | -1.8005517 |
| H  | -2.1578910 | 2.7744979  | 1.2526848  |
| H  | 2.1578910  | -2.7744979 | 1.2526848  |

$$R(\text{Au}^{\text{III}}\cdots\text{Au}^{\text{III}}) = 3.8 \text{ \AA}$$

|    |            |            |            |
|----|------------|------------|------------|
| Au | -0.1429296 | -1.8946164 | 0.0009972  |
| Au | 0.1429296  | 1.8946164  | 0.0009972  |
| N  | 1.1953558  | -2.5684396 | -1.5749130 |
| C  | -1.5293538 | -1.4317278 | -1.3916588 |
| C  | -1.5049751 | -1.4086876 | 1.4102227  |
| C  | 1.5049751  | 1.4086876  | 1.4102227  |
| C  | 1.5293538  | 1.4317278  | -1.3916588 |
| N  | -1.1953558 | 2.5684396  | -1.5749130 |
| N  | -1.2259560 | 2.5668624  | 1.5552478  |
| N  | 1.2259560  | -2.5668624 | 1.5552478  |
| H  | 2.1288352  | 2.2899153  | 1.5730196  |
| H  | -2.1409517 | -0.5831150 | 1.1010378  |
| H  | 0.9752489  | 1.1574261  | 2.3308182  |
| H  | -2.1288352 | -2.2899153 | 1.5730196  |
| H  | 2.1409517  | 0.5831150  | 1.1010378  |
| H  | -0.9752489 | -1.1574261 | 2.3308182  |
| H  | -1.3852318 | 1.8544759  | 2.2668473  |
| H  | 0.8104112  | -3.3634453 | 2.0414160  |
| H  | -0.8104112 | 3.3634453  | 2.0414160  |
| H  | 1.3852318  | -1.8544759 | 2.2668473  |
| H  | 2.0778396  | -2.0616212 | -1.6423713 |
| H  | -0.7472408 | 2.4817620  | -2.4873060 |
| H  | -2.0778396 | 2.0616212  | -1.6423713 |
| H  | 1.4336181  | -3.5569753 | -1.4815414 |
| H  | 0.7472408  | -2.4817620 | -2.4873060 |
| H  | -1.4336181 | 3.5569753  | -1.4815414 |
| H  | -2.3767072 | -0.8879832 | -0.9817082 |
| H  | 1.0446883  | 0.8497664  | -2.1772947 |
| H  | -1.0446883 | -0.8497664 | -2.1772947 |
| H  | 1.8864535  | 2.3797476  | -1.8005517 |
| H  | 2.3767072  | 0.8879832  | -0.9817082 |
| H  | -1.8864535 | -2.3797476 | -1.8005517 |
| H  | -2.1500828 | 2.8744367  | 1.2526848  |
| H  | 2.1500828  | -2.8744367 | 1.2526848  |

$$R(\text{Au}^{\text{III}}\cdots\text{Au}^{\text{III}}) = 4.0 \text{ \AA}$$

|    |            |            |            |
|----|------------|------------|------------|
| Au | -0.1506464 | -1.9943183 | 0.0009972  |
| Au | 0.1506464  | 1.9943183  | 0.0009972  |
| N  | 1.1875734  | -2.6682718 | -1.5749130 |
| C  | -1.5370255 | -1.5312948 | -1.3916588 |
| C  | -1.5126446 | -1.5082570 | 1.4102227  |
| C  | 1.5126446  | 1.5082570  | 1.4102227  |
| C  | 1.5370255  | 1.5312948  | -1.3916588 |
| N  | -1.1875734 | 2.6682718  | -1.5749130 |
| N  | -1.2181738 | 2.6666977  | 1.5552478  |
| N  | 1.2181738  | -2.6666977 | 1.5552478  |
| H  | 2.1365905  | 2.3894240  | 1.5730196  |
| H  | -2.1485408 | -0.6826225 | 1.1010378  |
| H  | 0.9828939  | 1.2570471  | 2.3308182  |
| H  | -2.1365905 | -2.3894240 | 1.5730196  |
| H  | 2.1485408  | 0.6826225  | 1.1010378  |
| H  | -0.9828939 | -1.2570471 | 2.3308182  |
| H  | -1.3775190 | 1.9543267  | 2.2668473  |
| H  | 0.8025515  | -3.4632401 | 2.0414160  |
| H  | -0.8025515 | 3.4632401  | 2.0414160  |
| H  | 1.3775190  | -1.9543267 | 2.2668473  |
| H  | 2.0701066  | -2.1615394 | -1.6423713 |
| H  | -0.7394669 | 2.5815506  | -2.4873060 |
| H  | -2.0701066 | 2.1615394  | -1.6423713 |
| H  | 1.4257395  | -3.6568307 | -1.4815414 |
| H  | 0.7394669  | -2.5815506 | -2.4873060 |
| H  | -1.4257395 | 3.6568307  | -1.4815414 |
| H  | -2.3843259 | -0.9874678 | -0.9817082 |
| H  | 1.0523033  | 0.9493806  | -2.1772947 |
| H  | -1.0523033 | -0.9493806 | -2.1772947 |
| H  | 1.8942175  | 2.4792799  | -1.8005517 |
| H  | 2.3843259  | 0.9874678  | -0.9817082 |
| H  | -1.8942175 | -2.4792799 | -1.8005517 |
| H  | -2.1422707 | 2.9743619  | 1.2526848  |
| H  | 2.1422707  | -2.9743619 | 1.2526848  |

$$R(\text{Au}^{\text{III}}\cdots\text{Au}^{\text{III}}) = 4.2 \text{ \AA}$$

|    |            |            |            |
|----|------------|------------|------------|
| Au | -0.1583697 | -2.0940198 | 0.0009972  |
| Au | 0.1583697  | 2.0940198  | 0.0009972  |
| N  | 1.1797886  | -2.7680954 | -1.5749130 |
| C  | -1.5447065 | -1.6308698 | -1.3916588 |
| C  | -1.5203235 | -1.6078343 | 1.4102227  |
| C  | 1.5203235  | 1.6078343  | 1.4102227  |
| C  | 1.5447065  | 1.6308698  | -1.3916588 |
| N  | -1.1797886 | 2.7680954  | -1.5749130 |
| N  | -1.2103891 | 2.7665240  | 1.5552478  |
| N  | 1.2103891  | -2.7665240 | 1.5552478  |
| H  | 2.1443498  | 2.4889443  | 1.5730196  |
| H  | -2.1561445 | -0.7821417 | 1.1010378  |
| H  | 0.9905500  | 1.3566726  | 2.3308182  |
| H  | -2.1443498 | -2.4889443 | 1.5730196  |
| H  | 2.1561445  | 0.7821417  | 1.1010378  |
| H  | -0.9905500 | -1.3566726 | 2.3308182  |
| H  | -1.3697993 | 2.0541675  | 2.2668473  |
| H  | 0.7946942  | -3.5630286 | 2.0414160  |
| H  | -0.7946942 | 3.5630286  | 2.0414160  |
| H  | 1.3697993  | -2.0541675 | 2.2668473  |
| H  | 2.0623680  | -2.2614435 | -1.6423713 |
| H  | -0.7316900 | 2.6813333  | -2.4873060 |
| H  | -2.0623680 | 2.2614435  | -1.6423713 |
| H  | 1.4178645  | -3.7566760 | -1.4815414 |
| H  | 0.7316900  | -2.6813333 | -2.4873060 |
| H  | -1.4178645 | 3.7566760  | -1.4815414 |
| H  | -2.3919574 | -1.0869655 | -0.9817082 |
| H  | 1.0599313  | 1.0489998  | -2.1772947 |
| H  | -1.0599313 | -1.0489998 | -2.1772947 |
| H  | 1.9019851  | 2.5788223  | -1.8005517 |
| H  | 2.3919574  | 1.0869655  | -0.9817082 |
| H  | -1.9019851 | -2.5788223 | -1.8005517 |
| H  | -2.1344579 | 3.0742725  | 1.2526848  |
| H  | 2.1344579  | -3.0742725 | 1.2526848  |

$$R(\text{Au}^{\text{III}}\cdots\text{Au}^{\text{III}}) = 4.4 \text{ \AA}$$

|    |            |            |            |
|----|------------|------------|------------|
| Au | -0.1661024 | -2.1937206 | 0.0009972  |
| Au | 0.1661024  | 2.1937206  | 0.0009972  |
| N  | 1.1719971  | -2.8679128 | -1.5749130 |
| C  | -1.5523988 | -1.7304497 | -1.3916588 |
| C  | -1.5280138 | -1.7074163 | 1.4102227  |
| C  | 1.5280138  | 1.7074163  | 1.4102227  |
| C  | 1.5523988  | 1.7304497  | -1.3916588 |
| N  | -1.1719971 | 2.8679128  | -1.5749130 |
| N  | -1.2025978 | 2.8663441  | 1.5552478  |
| N  | 1.2025978  | -2.8663441 | 1.5552478  |
| H  | 2.1521169  | 2.5884719  | 1.5730196  |
| H  | -2.1637628 | -0.8816683 | 1.1010378  |
| H  | 0.9982184  | 1.4563008  | 2.3308182  |
| H  | -2.1521169 | -2.5884719 | 1.5730196  |
| H  | 2.1637628  | 0.8816683  | 1.1010378  |
| H  | -0.9982184 | -1.4563008 | 2.3308182  |
| H  | -1.3620701 | 2.1540015  | 2.2668473  |
| H  | 0.7868334  | -3.6628124 | 2.0414160  |
| H  | -0.7868334 | 3.6628124  | 2.0414160  |
| H  | 1.3620701  | -2.1540015 | 2.2668473  |
| H  | 2.0546207  | -2.3613379 | -1.6423713 |
| H  | -0.7239060 | 2.7811117  | -2.4873060 |
| H  | -2.0546207 | 2.3613379  | -1.6423713 |
| H  | 1.4099868  | -3.8565142 | -1.4815414 |
| H  | 0.7239060  | -2.7811117 | -2.4873060 |
| H  | -1.4099868 | 3.8565142  | -1.4815414 |
| H  | -2.3996023 | -1.1864715 | -0.9817082 |
| H  | 1.0675729  | 1.1486220  | -2.1772947 |
| H  | -1.0675729 | -1.1486220 | -2.1772947 |
| H  | 1.9097600  | 2.6783711  | -1.8005517 |
| H  | 2.3996023  | 1.1864715  | -0.9817082 |
| H  | -1.9097600 | -2.6783711 | -1.8005517 |
| H  | -2.1266398 | 3.1741732  | 1.2526848  |
| H  | 2.1266398  | -3.1741732 | 1.2526848  |



## 8. Cartesian coordinates of $[\text{Au}^{\text{III}}(\text{CH}_3)_3(\text{NH}_3)] \cdots [(\text{CH}_4)_3(\text{NH}_3)]_2$ .

$R(\text{Au}^{\text{III}} \cdots \text{Au}^{\text{III}}) = 3.48 \text{ \AA}$

|    |            |            |            |
|----|------------|------------|------------|
| Au | -0.2929092 | -1.7151689 | 0.0040000  |
| C  | -1.1499092 | -1.7401689 | -1.9090000 |
| C  | -2.0889092 | -1.9601689 | 0.8770000  |
| C  | 0.5380908  | -1.7951689 | 1.9030000  |
| C  | -0.5380908 | 1.7951689  | 1.9030000  |
| C  | 2.0889092  | 1.9601689  | 0.8770000  |
| C  | 1.1499092  | 1.7401689  | -1.9090000 |
| N  | -1.6450908 | 1.4491689  | -0.8760000 |
| N  | 1.6450908  | -1.4491689 | -0.8760000 |
| H  | -0.7020908 | 2.8411689  | 2.1840000  |
| H  | -0.1179092 | -1.3411689 | 2.6470000  |
| H  | -1.4990908 | 1.2721689  | 1.9390000  |
| H  | 0.7020908  | -2.8411689 | 2.1840000  |
| H  | 0.1179092  | 1.3411689  | 2.6470000  |
| H  | 1.4990908  | -1.2721689 | 1.9390000  |
| H  | -2.3890908 | 1.7661689  | -0.2610000 |
| H  | 1.7390908  | -1.9191689 | -1.7730000 |
| H  | -1.7390908 | 1.9191689  | -1.7730000 |
| H  | 2.3890908  | -1.7661689 | -0.2610000 |
| H  | -0.6369092 | -1.0711689 | -2.6100000 |
| H  | 2.2189092  | 1.5051689  | -1.9330000 |
| H  | 0.6369092  | 1.0711689  | -2.6100000 |
| H  | -1.0569092 | -2.7591689 | -2.3010000 |
| H  | -2.2189092 | -1.5051689 | -1.9330000 |
| H  | 1.0569092  | 2.7591689  | -2.3010000 |
| H  | -2.3829092 | -1.0091689 | 1.3270000  |
| H  | 2.8349092  | 2.2751689  | 0.1470000  |
| H  | -2.8349092 | -2.2751689 | 0.1470000  |
| H  | 2.0049092  | 2.7051689  | 1.6680000  |
| H  | 2.3829092  | 1.0091689  | 1.3270000  |
| H  | -2.0049092 | -2.7051689 | 1.6680000  |
| H  | -1.7620908 | 0.4461689  | -1.0320000 |
| H  | 1.7620908  | -0.4461689 | -1.0320000 |
| H  | -0.2531449 | 1.6929706  | 0.8856245  |
| H  | 1.1609544  | 1.8746214  | 0.3973193  |
| H  | 0.6293765  | 1.6268306  | -0.9891146 |

$R(\text{Au}^{\text{III}}\dots\text{Au}^{\text{III}}) = 3.59 \text{ \AA}$

|    |            |            |            |
|----|------------|------------|------------|
| Au | 0.3021678  | 1.7693840  | 0.0040000  |
| C  | -1.1591678 | -1.7943840 | -1.9090000 |
| C  | -2.0981678 | -2.0143840 | 0.8770000  |
| C  | 0.5288322  | -1.8493840 | 1.9030000  |
| C  | -0.5288322 | 1.8493840  | 1.9030000  |
| C  | 2.0981678  | 2.0143840  | 0.8770000  |
| C  | 1.1591678  | 1.7943840  | -1.9090000 |
| N  | -1.6358322 | 1.5033840  | -0.8760000 |
| N  | 1.6358322  | -1.5033840 | -0.8760000 |
| H  | -0.6928322 | 2.8953840  | 2.1840000  |
| H  | -0.1271678 | -1.3953840 | 2.6470000  |
| H  | -1.4898322 | 1.3263840  | 1.9390000  |
| H  | 0.6928322  | -2.8953840 | 2.1840000  |
| H  | 0.1271678  | 1.3953840  | 2.6470000  |
| H  | 1.4898322  | -1.3263840 | 1.9390000  |
| H  | -2.3798322 | 1.8203840  | -0.2610000 |
| H  | 1.7298322  | -1.9733840 | -1.7730000 |
| H  | -1.7298322 | 1.9733840  | -1.7730000 |
| H  | 2.3798322  | -1.8203840 | -0.2610000 |
| H  | -0.6461678 | -1.1253840 | -2.6100000 |
| H  | 2.2281678  | 1.5593840  | -1.9330000 |
| H  | 0.6461678  | 1.1253840  | -2.6100000 |
| H  | -1.0661678 | -2.8133840 | -2.3010000 |
| H  | -2.2281678 | -1.5593840 | -1.9330000 |
| H  | 1.0661678  | 2.8133840  | -2.3010000 |
| H  | -2.3921678 | -1.0633840 | 1.3270000  |
| H  | 2.8441678  | 2.3293840  | 0.1470000  |
| H  | -2.8441678 | -2.3293840 | 0.1470000  |
| H  | 2.0141678  | 2.7593840  | 1.6680000  |
| H  | 2.3921678  | 1.0633840  | 1.3270000  |
| H  | -2.0141678 | -2.7593840 | 1.6680000  |
| H  | -1.7528322 | 0.5003840  | -1.0320000 |
| H  | 1.7528322  | -0.5003840 | -1.0320000 |
| H  | -1.1708326 | -1.9297862 | 0.3961938  |
| H  | -0.6393256 | -1.6805291 | -0.9890554 |
| H  | 0.2429363  | -1.7471290 | 0.8859903  |

## 9. Cartesian coordinates of $[(\text{CH}_3)_3\text{N}]_2$ .

$R(\text{Au}^{\text{III}}\cdots\text{Au}^{\text{III}}) = 3.48 \text{ \AA}$

|   |            |            |            |
|---|------------|------------|------------|
| C | -1.1588184 | -1.7923377 | -1.9090000 |
| C | -2.0978184 | -2.0123377 | 0.8770000  |
| C | 0.5291816  | -1.8473377 | 1.9030000  |
| C | -0.5470000 | 1.7430000  | 1.9030000  |
| C | 2.0800000  | 1.9080000  | 0.8770000  |
| C | 1.1410000  | 1.6880000  | -1.9090000 |
| N | -1.6540000 | 1.3970000  | -0.8760000 |
| N | 1.6361817  | -1.5013377 | -0.8760000 |
| H | -0.7110000 | 2.7890000  | 2.1840000  |
| H | -0.1268183 | -1.3933377 | 2.6470000  |
| H | -1.5080000 | 1.2200000  | 1.9390000  |
| H | 0.6931817  | -2.8933377 | 2.1840000  |
| H | 0.1090000  | 1.2890000  | 2.6470000  |
| H | 1.4901817  | -1.3243377 | 1.9390000  |
| H | -2.3980000 | 1.7140000  | -0.2610000 |
| H | 1.7301816  | -1.9713377 | -1.7730000 |
| H | -1.7480000 | 1.8670000  | -1.7730000 |
| H | 2.3801816  | -1.8183377 | -0.2610000 |
| H | -0.6458184 | -1.1233377 | -2.6100000 |
| H | 2.2100000  | 1.4530000  | -1.9330000 |
| H | 0.6280000  | 1.0190000  | -2.6100000 |
| H | -1.0658183 | -2.8113377 | -2.3010000 |
| H | -2.2278184 | -1.5573377 | -1.9330000 |
| H | 1.0480000  | 2.7070000  | -2.3010000 |
| H | -2.3918183 | -1.0613377 | 1.3270000  |
| H | 2.8260000  | 2.2230000  | 0.1470000  |
| H | -2.8438183 | -2.3273377 | 0.1470000  |
| H | 1.9960000  | 2.6530000  | 1.6680000  |
| H | 2.3740000  | 0.9570000  | 1.3270000  |
| H | -2.0138183 | -2.7573377 | 1.6680000  |
| H | -1.7710000 | 0.3940000  | -1.0320000 |
| H | 1.7531816  | -0.4983377 | -1.0320000 |
| H | 0.6243078  | 1.5719932  | -0.9888459 |
| H | 1.1557764  | 1.8223395  | 0.3912549  |
| H | -0.2571825 | 1.6441677  | 0.8868701  |
| H | -1.1737004 | -1.9263152 | 0.3912489  |
| H | 0.2389573  | -1.7485559 | 0.8869912  |
| H | -0.6425925 | -1.6770483 | -0.9885311 |

$R(\text{Au}^{\text{III}}\dots\text{Au}^{\text{III}}) = 3.59 \text{ \AA}$

|   |            |            |            |
|---|------------|------------|------------|
| C | -1.1410000 | -1.6880000 | -1.9090000 |
| C | -2.0800000 | -1.9080000 | 0.8770000  |
| C | 0.5470000  | -1.7430000 | 1.9030000  |
| C | -0.5106644 | 1.9557679  | 1.9030000  |
| C | 2.1163356  | 2.1207679  | 0.8770000  |
| C | 1.1773356  | 1.9007679  | -1.9090000 |
| N | -1.6176644 | 1.6097679  | -0.8760000 |
| N | 1.6540000  | -1.3970000 | -0.8760000 |
| H | -0.6746644 | 3.0017679  | 2.1840000  |
| H | -0.1090000 | -1.2890000 | 2.6470000  |
| H | -1.4716644 | 1.4327679  | 1.9390000  |
| H | 0.7110000  | -2.7890000 | 2.1840000  |
| H | 0.1453356  | 1.5017679  | 2.6470000  |
| H | 1.5080000  | -1.2200000 | 1.9390000  |
| H | -2.3616644 | 1.9267679  | -0.2610000 |
| H | 1.7480000  | -1.8670000 | -1.7730000 |
| H | -1.7116644 | 2.0797679  | -1.7730000 |
| H | 2.3980000  | -1.7140000 | -0.2610000 |
| H | -0.6280000 | -1.0190000 | -2.6100000 |
| H | 2.2463356  | 1.6657679  | -1.9330000 |
| H | 0.6643356  | 1.2317679  | -2.6100000 |
| H | -1.0480000 | -2.7070000 | -2.3010000 |
| H | -2.2100000 | -1.4530000 | -1.9330000 |
| H | 1.0843356  | 2.9197679  | -2.3010000 |
| H | -2.3740000 | -0.9570000 | 1.3270000  |
| H | 2.8623356  | 2.4357679  | 0.1470000  |
| H | -2.8260000 | -2.2230000 | 0.1470000  |
| H | 2.0323356  | 2.8657679  | 1.6680000  |
| H | 2.4103356  | 1.1697679  | 1.3270000  |
| H | -1.9960000 | -2.6530000 | 1.6680000  |
| H | -1.7346644 | 0.6067679  | -1.0320000 |
| H | 1.7710000  | -0.3940000 | -1.0320000 |
| H | -0.6257291 | -1.5716351 | -0.9882094 |
| H | -1.1560068 | -1.8230912 | 0.3909078  |
| H | 0.2561666  | -1.6451970 | 0.8871947  |
| H | 0.6622451  | 1.7848053  | -0.9880612 |
| H | 1.1922011  | 2.0368932  | 0.3909979  |
| H | -0.2194934 | 1.8572929  | 0.8873642  |
